# Supplementary material for: A hydrophilic magnetic MOF for the consecutive enrichment of exosomes and exosomal phosphopeptides
Source: Royal Society of Chemistry journal article supplement (doi:10.1039/d0cc06147f), 2020-01-01
Supplement: d0cc06147f1.xlsx [file d0cc06147f1.xlsx]

## Sheet: Sheet1
Sequence	# PSMs	# Proteins	# Protein Groups	Protein Group Accessions	Modifications	ΔCn	phosphoRS Site Probabilities	Area	q-Value	PEP	IonScore	Exp Value	Charge	MH+ [Da]	ΔM [ppm]	RT [min]	# Missed Cleavages
DGPcGtVLTR	1	1	1	P07911	C4(Carbamidomethyl); T6(Phospho)	0	T(6): 100.0; T(9): 0.0	3.3083e+06	0	0.0005419	75.38	4.7951e-07	2	1155.48	-2.07698	18.2531	0
StEYGEGYAcDTDLR	5	1	1	P07911	T2(Phospho); C10(Carbamidomethyl)	0	S(1): 50.0; T(2): 50.0; Y(4): 0.0; Y(8): 0.0; T(12): 0.0	6.70857e+07	0	0.00599	57.19	2.97937e-05	2	1816.66	-5.20868	21.1551	0
DWVsVVTPAR	1	1	1	P07911	S4(Phospho)	0	S(4): 100.0; T(7): 0.0	3038876	0.001	0.02045	45.54	0.000612963	2	1209.57	0.732527	32.6442	0
TALQPmVsALNIR	1	1	1	P07911	M6(Oxidation); S8(Phospho)	0	T(1): 0.0; S(8): 100.0	1.20284e+07	0.003	0.08956	17.83	0.492801	2	1509.75	1.12668	29.0849	0
VFMYLsDSR	1	1	1	P07911	S6(Phospho)	0	Y(4): 1.1; S(6): 98.9; S(8): 0.0	2.27732e+06	0.005	0.02689	23.52	0.079589	2	1197.5	0.197079	28.545	0
KAEAAAsALADADADLEER	4	1	1	O43633	S7(Phospho)	0	S(7): 100.0	2.75421e+08	0	4.028e-11	138.68	5.47497e-13	2	1996.89	0.912761	25.2711	1
AEAAAsALADADADLEER	4	1	1	O43633	S6(Phospho)	0	S(6): 100.0	4.3382e+08	0	1.993e-08	124.08	1.32104e-11	2	1868.79	1.43219	28.3197	0
SEsQMDITDINTPKPK	4	1	1	P08473	S3(Phospho)	0	S(1): 0.0; S(3): 100.0; T(8): 0.0; T(12): 0.0	2.51361e+08	0	1.301e-07	80.08	4.03008e-07	2	1883.85	0.727871	22.4277	0
SEsQmDITDINTPKPK	9	1	1	P08473	S3(Phospho); M5(Oxidation)	0	S(1): 0.9; S(3): 99.1; T(8): 0.0; T(12): 0.0	8.7826e+07	0	0.001443	58.58	5.89371e-05	3	1899.84	0.756836	17.4571	0
GKsESQmDITDINTPKPK	8	1	1	P08473	S3(Phospho); M7(Oxidation)	0	S(3): 100.0; S(5): 0.0; T(10): 0.0; T(14): 0.0	2.77653e+08	0	0.0001065	56.61	9.81137e-05	3	2084.96	0.638322	19.0668	1
GKsESQMDITDINTPKPK	8	1	1	P08473	S3(Phospho)	0	S(3): 100.0; S(5): 0.0; T(10): 0.0; T(14): 0.0	2.28545e+08	0	1.325e-08	50.01	0.000440983	3	2068.96	0.339031	21.957	1
SEsQmDITDInTPKPK	2	1	1	P08473	S3(Phospho); M5(Oxidation); N11(Deamidated)	0	S(1): 0.8; S(3): 99.2; T(8): 0.0; T(12): 0.0	0	0.001	0.01799	45.25	0.00132103	3	1900.84	8.07363	16.7826	0
GKsEsQMDITDINTPKPK	1	1	1	P08473	S3(Phospho); S5(Phospho)	0	S(3): 100.0; S(5): 100.0; T(10): 0.0; T(14): 0.0	6.27258e+06	0.001	0.02505	19.85	0.448734	3	2148.93	0.429598	21.7769	1
GKsESQmDITDInTPKPK	2	1	1	P08473	S3(Phospho); M7(Oxidation); N13(Deamidated)	0	S(3): 50.0; S(5): 50.0; T(10): 0.0; T(14): 0.0	9.51487e+06	0.002	0.05385	20.43	0.392635	3	2085.95	2.56573	19.7668	1
GKsEsQmDITDINTPKPK	1	1	1	P08473	S3(Phospho); S5(Phospho); M7(Oxidation)	0	S(3): 100.0; S(5): 100.0; T(10): 0.1; T(14): 0.0	3.28197e+06	0.002	0.07221	20.38	0.427417	3	2164.93	1.7321	16.3666	1
ATANSQVMGSANStLR	3	1	1	Q9NQ84	T14(Phospho)	0	T(2): 0.0; S(5): 0.0; S(10): 0.0; S(13): 0.8; T(14): 99.2	1.07624e+08	0	1.012e-07	104.52	1.17963e-09	2	1687.75	0.719446	16.4228	0
ATANSQVMGSAnStLR	3	1	1	Q9NQ84	N12(Deamidated); T14(Phospho)	0	T(2): 0.0; S(5): 0.0; S(10): 0.0; S(13): 0.6; T(14): 99.4	37096198	0	5.137e-07	97.64	5.40667e-09	2	1688.73	0.0641904	16.8878	0
ATANSQVMGSANsTLR	3	1	1	Q9NQ84	S13(Phospho)	0	T(2): 0.0; S(5): 0.0; S(10): 0.0; S(13): 99.3; T(14): 0.7	1.31844e+08	0	3.597e-14	80.07	3.2866e-07	2	1687.75	1.94901	17.3897	0
ATANSQVmGSAnStLR	1	1	1	Q9NQ84	M8(Oxidation); N12(Deamidated); T14(Phospho)	0	T(2): 0.0; S(5): 0.0; S(10): 0.0; S(13): 0.7; T(14): 99.3	2.32458e+07	0	2.373e-06	89.51	3.67735e-08	2	1704.73	1.97236	13.6596	0
ATANSQVmGSANsTLR	5	1	1	Q9NQ84	M8(Oxidation); S13(Phospho)	0	T(2): 0.0; S(5): 0.0; S(10): 0.0; S(13): 99.2; T(14): 0.8	64822386	0	6.873e-08	87.37	5.97335e-08	2	1703.75	1.83444	14.0496	0
AEDMySAQSHQAATPPK	2	1	1	Q9NQ84	Y5(Phospho)	0	Y(5): 99.4; S(6): 0.6; S(9): 0.0; T(14): 0.0	2.01352e+07	0	1.914e-09	87.47	6.33874e-08	2	1911.8	2.56284	12.2041	0
VPsEGAYDIILPR	7	1	1	Q9NQ84	S3(Phospho)	0	S(3): 100.0; Y(7): 0.0	4.8036e+08	0	2.585e-06	76.46	7.26409e-07	2	1509.74	0.700263	33.48	0
AEDmySAQSHQAATPPK	1	1	1	Q9NQ84	M4(Oxidation); Y5(Phospho)	0	Y(5): 99.1; S(6): 0.9; S(9): 0.0; T(14): 0.0	6588728	0	7.825e-05	65.28	9.47264e-06	2	1927.79	2.01324	11.1437	0
ATANSQVmGsANsTLR	1	1	1	Q9NQ84	M8(Oxidation); S10(Phospho); S13(Phospho)	0	T(2): 0.0; S(5): 0.0; S(10): 100.0; S(13): 50.0; T(14): 50.0	2.43693e+07	0	0.000302	55.59	6.39074e-05	2	1783.71	0.165606	17.1696	0
AFsMDEPVAAK	1	1	1	Q9NQ84	S3(Phospho)	0	S(3): 100.0	8.45103e+07	0	0.0005548	51.97	0.000107053	2	1245.52	-1.60824	23.9014	0
ATANSQVmGSANStLR	1	1	1	Q9NQ84	M8(Oxidation); T14(Phospho)	0	T(2): 0.0; S(5): 0.0; S(10): 0.0; S(13): 0.9; T(14): 99.1	3.80213e+07	0	0.001175	42.69	0.00175476	2	1703.75	1.83444	13.1599	0
VPsEGAyDIILPR	1	1	1	Q9NQ84	S3(Phospho); Y7(Phospho)	0	S(3): 100.0; Y(7): 100.0	2.3295e+07	0	0.003127	41.55	0.00207853	2	1589.7	1.18846	37.6723	0
GQsmFVENK	2	1	1	Q9NQ84	S3(Phospho); M4(Oxidation)	0	S(3): 100.0	2.38178e+07	0	0.008967	40.77	0.00150337	2	1135.45	0.550671	14.4881	0
GVGyETILK	4	1	1	Q9NQ84	Y4(Phospho)	0	Y(4): 100.0; T(6): 0.0	630022572	0	0.01351	33.93	0.0065339	2	1059.51	0.472492	22.9569	0
SSPEQSYQGDMyPTR	1	1	1	Q9NQ84	Y12(Phospho)	0	S(1): 0.0; S(2): 0.0; S(6): 0.0; Y(7): 0.0; Y(12): 1.0; T(14): 99.0	3.42895e+07	0	0.0005078	33.85	0.00937522	2	1825.71	-0.688246	16.8194	0
SSPEQsYQGDmYPTR	3	1	1	Q9NQ84	S6(Phospho); M11(Oxidation)	0	S(1): 0.0; S(2): 0.0; S(6): 50.0; Y(7): 50.0; Y(12): 0.0; T(14): 0.0	9.88601e+06	0	0.002452	31.52	0.0141996	2	1841.71	2.41016	14.387	0
AEDMYSAQSHQAAtPPKDGK	4	1	1	Q9NQ84	T14(Phospho)	0	Y(5): 0.0; S(6): 0.0; S(9): 0.0; T(14): 100.0	1.21392e+08	0	0.001415	30.79	0.0390163	3	2211.94	1.45565	12.2767	1
AEDmYSAQSHQAAtPPKDGK	2	1	1	Q9NQ84	M4(Oxidation); T14(Phospho)	0	Y(5): 0.0; S(6): 0.0; S(9): 0.0; T(14): 100.0	6.71088e+07	0	0.000861	27.83	0.0685636	3	2227.93	-3.28565	11.2652	1
DGKNsQVFR	2	1	1	Q9NQ84	S5(Phospho)	0	S(5): 100.0	2.24744e+08	0.001	0.04671	40.58	0.00144372	2	1130.5	0.655602	13.416	1
GVGyEtILK	1	1	1	Q9NQ84	Y4(Phospho); T6(Phospho)	0	Y(4): 100.0; T(6): 100.0	1.63079e+07	0.001	0.02115	35.16	0.00419086	2	1139.48	-1.08013	28.7597	0
ATANSQVMGsANStLR	1	1	1	Q9NQ84	S10(Phospho); T14(Phospho)	0	T(2): 0.0; S(5): 0.0; S(10): 0.0; S(13): 100.0; T(14): 100.0	1.97836e+07	0.001	0.03912	31.67	0.0172915	2	1767.71	-0.706885	20.687	0
GQsMFVENK	1	1	1	Q9NQ84	S3(Phospho)	0	S(3): 100.0	5.5086e+07	0.002	0.05301	35.83	0.00378763	2	1119.45	0.486971	17.7476	0
AFsmDEPVAAK	1	1	1	Q9NQ84	S3(Phospho); M4(Oxidation)	0	S(3): 100.0	5.40506e+07	0.002	0.05155	24.4	0.0568217	2	1261.52	1.0883	18.7096	0
DGKnsQVFR	1	1	1	Q9NQ84	N4(Deamidated); S5(Phospho)	0	S(5): 100.0	1.24469e+07	0.003	0.1122	24.31	0.0563435	2	1131.48	0.325004	13.2461	1
ATAnSQVMGsANsTLR	1	1	1	Q9NQ84	N4(Deamidated); S10(Phospho); S13(Phospho)	0	T(2): 0.0; S(5): 0.0; S(10): 50.7; S(13): 50.7; T(14): 98.7	8.63784e+06	0.005	0.1327	10.92	1.72337	2	1768.69	-1.74583	24.0967	0
ATANSQVMGsANsTLR	4	1	1	Q9NQ84	S10(Phospho); S13(Phospho)	0	T(2): 0.0; S(5): 0.0; S(10): 100.0; S(13): 50.0; T(14): 50.0	6.09196e+07	0	4.835e-16	72.03	1.68559e-06	2	1767.72	1.22667	22.6038	0
SSPEQSYQGDmyPTR	1	1	1	Q9NQ84	M11(Oxidation); Y12(Phospho)	0	S(1): 0.0; S(2): 0.0; S(6): 0.0; Y(7): 0.0; Y(12): 1.0; T(14): 99.0	1.03216e+07	0	1.922e-10	33.68	0.00790672	2	1841.7	-0.108518	14.0891	0
AEDMySAQSHQAAtPPKDGK	1	1	1	Q9NQ84	Y5(Phospho); T14(Phospho)	0	Y(5): 33.3; S(6): 33.3; S(9): 33.3; T(14): 100.0	1.35253e+07	0.001	0.005335	21.06	0.280468	3	2291.91	1.5815	11.8489	1
AEDmySAQSHQAAtPPKDGK	3	1	1	Q9NQ84	M4(Oxidation); Y5(Phospho); T14(Phospho)	0	Y(5): 34.2; S(6): 34.2; S(9): 34.2; T(14): 97.5	4.88913e+06	0.005	0.03739	15.31	0.962826	3	2307.9	1.12923	10.8997	1
sQMEEVQDELIHR	1	1	1	Q12929	S1(Phospho)	0	S(1): 100.0	2.59593e+07	0	2.924e-05	85.06	9.8245e-08	2	1693.72	-1.76341	24.0813	0
KGPGEGVLtLR	2	1	1	Q12929	T9(Phospho)	0	T(9): 100.0	1.58649e+08	0	0.00176	83	1.02493e-07	2	1206.62	0.128414	22.9628	1
QNSSSSDSGGsIVR	3	1	1	Q12929	S11(Phospho)	0	S(3): 0.0; S(4): 0.0; S(5): 0.0; S(6): 0.0; S(8): 0.0; S(11): 100.0	1.00014e+07	0	2.522e-05	66.79	3.90552e-06	2	1460.6	1.17256	12.3027	0
KsQMEEVQDELIHR	1	1	1	Q12929	S2(Phospho)	0	S(2): 100.0	1.39714e+07	0	0.0002919	65.35	1.39599e-05	3	1821.82	0.765748	23.3857	1
APAPAPPGtVTQVDVR	2	1	1	Q12929	T9(Phospho)	0	T(9): 100.0; T(11): 0.0	1.11078e+08	0	4.474e-05	60.75	2.6546e-05	2	1655.82	0.517816	23.0272	0
RKsQmEEVQDELIHR	2	1	1	Q12929	S3(Phospho); M5(Oxidation)	0	S(3): 100.0	1.46888e+07	0	0.0002183	57.88	6.56606e-05	3	1993.92	-0.385109	22.8929	2
GPGEGVLtLR	1	1	1	Q12929	T8(Phospho)	0	T(8): 100.0	7.30634e+07	0	0.0001069	55.94	5.52662e-05	2	1078.53	-0.196533	24.923	0
RKsQMEEVQDELIHR	3	1	1	Q12929	S3(Phospho)	0	S(3): 100.0	1.93107e+07	0	0.003794	41.86	0.00271077	3	1977.92	0.404444	24.8493	2
AAEAFSELsKR	1	1	1	Q12929	S9(Phospho)	0	S(6): 0.0; S(9): 100.0	7.14142e+06	0.001	0.0416	62.88	1.32414e-05	2	1288.6	2.50887	15.6664	1
VPANItR	1	1	1	Q12929	T6(Phospho)	0	T(6): 100.0	3.67263e+07	0.001	0.03059	46.73	0.000278145	2	850.418	0.189665	13.0973	0
QNSSSSDSGGSIVRDsQR	1	1	1	Q12929	S16(Phospho)	0	S(3): 0.0; S(4): 0.0; S(5): 0.0; S(6): 0.0; S(8): 0.0; S(11): 0.0; S(16): 99.9	6464958	0.001	0.03361	18.99	0.40757	3	1946.82	0.626601	11.3152	1
AALEDsSGSSELQEIMR	2	1	1	Q12929	S6(Phospho)	0	S(6): 49.3; S(7): 49.3; S(9): 0.7; S(10): 0.7	1.41847e+06	0.002	0.06534	13.71	1.66622	2	1902.82	2.15426	30.7588	0
ADPPYTHtIQK	1	1	1	Q12929	T8(Phospho)	0	Y(5): 0.0; T(6): 0.8; T(8): 99.2	3.24932e+07	0.009	0.1901	28.9	0.0305315	2	1350.61	0.499359	13.2887	0
AAEAFSELsK	1	1	1	Q12929	S9(Phospho)	0	S(6): 0.0; S(9): 100.0	5.69564e+06	0	0.00493	40.89	0.0016457	2	1132.49	-0.0151888	19.3415	0
GSHLDQGEAAVAFKPtSNR	2	1	1	Q12929	T16(Phospho)	0	S(2): 0.0; T(16): 50.0; S(17): 50.0	3.21164e+07	0	2.645e-05	37.38	0.00762318	3	2064.95	-0.368257	21.1763	0
AALEDSsGSSELQEIMR	4	1	1	Q12929	S7(Phospho)	0	S(6): 25.0; S(7): 25.0; S(9): 25.0; S(10): 25.0	1.99265e+06	0.001	0.009331	25	0.125701	2	1902.82	2.98824	30.8666	0
sQmEEVQDELIHR	1	1	1	Q12929	S1(Phospho); M3(Oxidation)	0	S(1): 100.0	1.26505e+07	0.001	0.005335	22.64	0.150283	3	1709.72	-1.45803	19.9393	0
KGAGDGsDEEVDGK	1	1	1	P35579	S7(Phospho)	0	S(7): 100.0	2.26856e+07	0	1.749e-07	67.59	2.87398e-06	2	1443.57	1.37649	9.85534	1
KGAGDGsDEEVDGKADGAEAKPAE	1	1	1	P35579	S7(Phospho)	0	S(7): 100.0	1.24803e+07	0	4.835e-16	50.48	0.000425298	3	2382.99	0.175117	11.6663	2
mHEGDEGPGHHHKPGLGEGtP	8	1	1	P06702	M1(Oxidation); T20(Phospho)	0	T(20): 100.0	9.43923e+08	0	0.00016	18.24	0.56988	3	2271.93	1.49297	23.9056	0
MHEGDEGPGHHHKPGLGEGtP	2	1	1	P06702	T20(Phospho)	0	T(20): 100.0	121777604	0.001	0.03671	17.45	0.771716	4	2255.93	0.515139	24.5162	0
tcKmSQLER	1	1	1	P06702	N-Term(Acetyl); T1(Phospho); C2(Carbamidomethyl); M4(Oxidation)	0	T(1): 100.0; S(5): 0.0	1.49446e+07	0	0.02505	15.23	0.374895	2	1290.52	0.694584	24.1582	1
VWTSGQVEEYDLDADDINsR	5	1	1	P29972	S19(Phospho)	0	T(3): 0.0; S(4): 0.0; Y(10): 0.0; S(19): 100.0	7.97022e+07	0	5.445e-07	86.32	1.08156e-07	2	2392	0.449246	29.3934	0
VWTSGQVEEYDLDADDInsR	3	1	1	P29972	N18(Deamidated); S19(Phospho)	0	T(3): 0.0; S(4): 0.0; Y(10): 0.0; S(19): 100.0	1.06076e+07	0	0.003339	51.17	0.000331887	2	2392.98	-0.115082	30.0876	0
GNDsDGEGESDDPEKK	2	1	1	O75351	S4(Phospho)	0	S(4): 100.0; S(10): 0.0	7.20961e+07	0	1.523e-08	110.44	1.11601e-10	2	1758.64	1.91758	9.77879	1
GNDsDGEGESDDPEK	2	1	1	O75351	S4(Phospho)	0	S(4): 100.0; S(10): 0.0	1.4535e+08	0	2.481e-07	90.57	5.52511e-09	2	1630.54	1.16942	10.7128	0
EGQPSPADEKGnDsDGEGESDDPEK	2	1	1	O75351	N12(Deamidated); S14(Phospho)	0	S(5): 0.0; S(14): 100.0; S(20): 0.0	8.93527e+07	0	5.108e-08	74.5	9.4203e-07	3	2669.99	1.70963	12.0905	1
EGQPSPADEKGNDsDGEGESDDPEK	2	1	1	O75351	S14(Phospho)	0	S(5): 0.0; S(14): 100.0; S(20): 0.0	3.87448e+08	0	1.957e-07	64.95	9.8366e-06	3	2669.01	1.78157	11.7145	1
GnDsDGEGESDDPEK	1	1	1	O75351	N2(Deamidated); S4(Phospho)	0	S(4): 100.0; S(10): 0.0	7.1963e+06	0	3.652e-05	61.1	5.04561e-06	2	1631.53	1.31393	11.37	0
EGQPSPADEKGNDsDGEGESDDPEKK	3	1	1	O75351	S14(Phospho)	0	S(5): 0.0; S(14): 100.0; S(20): 0.0	1.56175e+08	0	5.681e-06	46.3	0.00112523	3	2797.1	1.80934	11.028	2
GnDsDGEGESDDPEKK	1	1	1	O75351	N2(Deamidated); S4(Phospho)	0	S(4): 100.0; S(10): 0.0	5.75497e+06	0	0.001186	46.26	0.000257885	2	1759.62	1.07994	10.0356	1
EGQPsPADEKGnDSDGEGESDDPEKK	1	1	1	O75351	S5(Phospho); N12(Deamidated)	0	S(5): 50.0; S(14): 50.0; S(20): 0.0	5.25986e+07	0.003	0.1074	15.24	1.25675	3	2798.09	2.06788	11.3487	2
EGQPsPADEKGNDsDGEGESDDPEK	1	1	1	O75351	S5(Phospho); S14(Phospho)	0	S(5): 99.8; S(14): 99.8; S(20): 0.4	3.95584e+06	0.007	0.1533	13.65	0.839305	3	2748.97	1.87701	13.066	1
DLQQsIAR	1	1	1	Q8WUM4	S5(Phospho)	0	S(5): 100.0	6.1316e+06	0	0.01217	46.83	0.000331986	2	1010.47	-0.151417	16.759	0
NISSAQIVGPGPKPEAsAK	9	1	1	P53990	S17(Phospho)	0	S(3): 0.0; S(4): 0.0; S(17): 100.0	1.53146e+08	0	2.582e-05	63.44	1.4923e-05	2	1930.97	0.856147	19.8106	0
TNQIGtVNDR	1	1	1	P53990	T6(Phospho)	0	T(1): 0.0; T(6): 100.0	1.02897e+07	0	0.00168	50.43	0.000155333	2	1197.53	0.75219	12.9076	0
ELDSGLAEsVSTLIWAAPR	4	1	1	P53990	S9(Phospho)	0	S(4): 25.0; S(9): 25.0; S(11): 25.0; T(12): 25.0	1.69682e+06	0.002	0.05343	23.09	0.212072	3	2095.01	-0.318047	40.6985	0
NIsSAQIVGPGPKPEAsAK	2	1	1	P53990	S3(Phospho); S17(Phospho)	0	S(3): 50.0; S(4): 50.0; S(17): 100.0	7.90954e+06	0.004	0.1242	22.54	0.238754	2	2010.93	-0.0995915	22.1549	0
ELDsGLAESVSTLIWAAPR	2	1	1	P53990	S4(Phospho)	0	S(4): 49.2; S(9): 49.2; S(11): 0.8; T(12): 0.8	3.20348e+06	0.001	0.005336	22.02	0.256562	2	2095.02	2.31039	40.7323	0
mIGFPSSAGSVsPR	2	1	1	P13646	M1(Oxidation); S12(Phospho)	0	S(6): 0.0; S(7): 0.0; S(10): 0.0; S(12): 100.0	1.27581e+08	0	7.906e-07	91.46	1.90771e-08	2	1488.66	0.727078	24.3612	0
MIGFPSSAGSVsPR	1	1	1	P13646	S12(Phospho)	0	S(6): 0.0; S(7): 0.0; S(10): 0.0; S(12): 100.0	190581575	0	8.746e-05	70.71	2.34374e-06	2	1472.66	0.763463	27.8366	0
QsPASPER	1	1	1	P13646	S2(Phospho)	0	S(2): 100.0; S(5): 0.0	2.15311e+06	0.003	0.09146	23.5	0.0491352	2	951.392	-0.852137	10.0757	0
GSGGGSSGGsIGGR	1	1	1	P04264	S10(Phospho)	0	S(2): 0.0; S(6): 0.0; S(7): 0.0; S(10): 100.0	2.69289e+06	0	0.000217	51.13	0.000107541	2	1172.47	-0.171058	10.124	0
sLVNLGGSK	1	1	1	P04264	S1(Phospho)	0	S(1): 100.0; S(8): 0.0	2.92417e+06	0.001	0.01434	33.15	0.0098287	2	954.466	0.566586	20.8872	0
mEsNLYQDQSEDKR	1	1	1	O75264	M1(Oxidation); S3(Phospho)	0	S(3): 100.0; Y(6): 0.0; S(10): 0.0	9.30451e+06	0	2.94e-05	91.65	2.00728e-08	2	1838.73	1.35423	12.5597	1
MEsNLYQDQSEDKR	3	1	1	O75264	S3(Phospho)	0	S(3): 100.0; Y(6): 0.0; S(10): 0.0	8.35849e+06	0	0.0001956	71.47	2.13499e-06	2	1822.73	1.4561	14.936	1
EGEsNLGLDLEEKEPGDHER	1	1	1	O75264	S4(Phospho)	0	S(4): 100.0	2.78258e+07	0	0.002696	23.33	0.221806	3	2332.99	0.807931	23.5556	1
EGEsNLGLDLEEK	1	1	1	O75264	S4(Phospho)	0	S(4): 100.0	5.77034e+06	0.002	0.05357	17.3	0.505557	2	1512.65	0.518406	27.3654	0
MESNLyQDQSEDKR	2	1	1	O75264	Y6(Phospho)	0	S(3): 0.0; Y(6): 100.0; S(10): 0.0	4.31856e+06	0	1.616e-10	56.49	6.60823e-05	2	1822.74	3.5322	11.9684	1
LTEELQTVEnGYHDNPTLEVMETSsEMQEK	4	1	1	O00592	N10(Deamidated); S25(Phospho)	0	T(2): 0.0; T(7): 0.0; Y(12): 0.0; T(17): 0.0; T(23): 0.0; S(24): 1.8; S(25): 98.2	1.21118e+07	0	6.602e-05	38.33	0.0125446	3	3562.52	2.51262	29.732	0
DDLDEEEDtHL	1	1	1	O00592	T9(Phospho)	0	T(9): 100.0	8.52691e+06	0	0.01174	35.18	0.00254847	2	1410.49	-0.655393	22.3488	0
IEDVGsDEEDDSGKDK	1	2	1	P08238	S6(Phospho)	0	S(6): 100.0; S(12): 0.0	9.6325e+06	0	3.802e-05	59.48	2.46293e-05	2	1817.7	0.235739	11.7572	1
IEDVGsDEEDDSGKDKK	2	2	1	P08238	S6(Phospho)	0	S(6): 100.0; S(12): 0.0	1.21266e+07	0	0.0002601	52.57	0.000187309	3	1945.79	-1.22925	10.9112	2
IEDVGsDEEDDSGK	1	2	1	P08238	S6(Phospho)	0	S(6): 100.0; S(12): 0.0	6809860	0.001	0.0251	36.4	0.00363103	2	1574.58	4.36306	14.2223	0
EKEIsDDEAEEEK	1	1	1	P08238	S5(Phospho)	0	S(5): 100.0	4.83986e+06	0.001	0.01103	21.18	0.146319	2	1630.64	1.23218	11.34	1
SQEQLAAELAEyTAK	3	1	1	P15311	Y12(Phospho)	0	S(1): 0.0; Y(12): 99.2; T(13): 0.8	1.59133e+07	0	2.719e-06	71.52	2.52632e-06	2	1731.78	-0.360118	28.4201	0
QLLtLSSELSQAR	1	1	1	P15311	T4(Phospho)	0	T(4): 100.0; S(6): 0.0; S(7): 0.0; S(10): 0.0	2.09267e+06	0	0.001729	53.54	0.000128572	2	1525.77	2.42137	32.9307	0
LQDyEEK	1	1	1	P15311	Y4(Phospho)	0	Y(4): 100.0	4.62929e+06	0.006	0.06481	20.08	0.0746128	2	1004.4	-0.180217	10.7475	0
AFsmDEHNAALR	2	1	1	Q9NZH0	S3(Phospho); M4(Oxidation)	0	S(3): 100.0	1.86701e+07	0	1.297e-05	97.27	3.54374e-09	2	1457.59	0.47568	15.268	0
AFsMDEHNAALR	3	1	1	Q9NZH0	S3(Phospho)	0	S(3): 100.0	48793320	0	1.331e-05	72.81	1.03149e-06	2	1441.59	-0.0826818	21.1477	0
TAGFPnGsLGK	4	1	1	Q9NZH0	N6(Deamidated); S8(Phospho)	0	T(1): 0.0; S(8): 100.0	3.77847e+09	0	0.0009041	57.11	3.58919e-05	2	1129.49	0.0115182	21.9645	0
TAGFPNGsLGK	3	1	1	Q9NZH0	S8(Phospho)	0	T(1): 0.0; S(8): 100.0	1.45967e+08	0	0.01392	39.55	0.00206861	2	1128.51	0.342427	20.1221	0
MREtAFEEDVQLPR	1	1	1	Q9NZH0	T4(Phospho)	0	T(4): 100.0	3.57802e+06	0	0.005002	35.82	0.00983128	3	1800.8	2.00965	26.4183	1
tAGFPnGsLGK	1	1	1	Q9NZH0	T1(Phospho); N6(Deamidated); S8(Phospho)	0	T(1): 100.0; S(8): 100.0	1.71e+07	0	0.01251	28.91	0.0152949	2	1209.46	-1.52172	28.1918	0
SNVYQPTEMAVVLnGGtIPTAPPSHTGR	6	1	1	Q9NZH0	N14(Deamidated); T17(Phospho)	0	S(1): 0.0; Y(4): 0.0; T(7): 0.0; T(17): 100.0; T(20): 0.0; S(24): 0.0; T(26): 0.0	1.1146e+08	0	0.000177	25.02	0.201928	3	2975.4	1.17548	31.483	0
mREtAFEEDVQLPR	1	1	1	Q9NZH0	M1(Oxidation); T4(Phospho)	0	T(4): 100.0	2.66118e+06	0.002	0.05122	26.61	0.0766138	3	1816.8	2.53998	25.0272	1
SNVYQPTEmAVVLnGGTIPtAPPsHTGR	2	1	1	Q9NZH0	M9(Oxidation); N14(Deamidated); T20(Phospho); S24(Phospho)	0	S(1): 0.0; Y(4): 0.0; T(7): 50.0; T(17): 50.0; T(20): 0.0; S(24): 50.0; T(26): 50.0	1.1868e+07	0.002	0.0708	19.38	0.925646	3	3071.36	1.35626	29.4806	0
RPsGSLGK	1	1	1	Q9NZH0	S3(Phospho)	0	S(3): 100.0; S(5): 0.0	2.61606e+09	0.004	0.1224	30.81	0.0107466	2	881.424	0.296911	9.77708	0
SNVyQPTEMAVVLnGGTIPTAPPsHTGR	2	1	1	Q9NZH0	Y4(Phospho); N14(Deamidated); S24(Phospho)	0	S(1): 0.1; Y(4): 95.0; T(7): 2.5; T(17): 2.5; T(20): 0.0; S(24): 50.0; T(26): 50.0	3.53952e+06	0.007	0.1542	14.25	2.72482	3	3055.37	0.737851	32.8986	0
SNVYQPTEMAVVLnGGtIPtAPPSHTGR	3	1	1	Q9NZH0	N14(Deamidated); T17(Phospho); T20(Phospho)	0	S(1): 0.0; Y(4): 1.9; T(7): 49.8; T(17): 49.8; T(20): 91.6; S(24): 3.4; T(26): 3.4	9393669	0.001	0.01178	11.97	4.58709	3	3055.36	0.258417	32.5956	0
RPSGsLGK	2	1	1	Q9NZH0	S5(Phospho)	0	S(3): 0.9; S(5): 99.1	0	0.006	0.04739	25.44	0.0372916	2	881.424	-0.187811	9.61066	0
SNVYQPTEmAVVLnGGtIPTAPPSHTGR	2	1	1	Q9NZH0	M9(Oxidation); N14(Deamidated); T17(Phospho)	0	S(1): 0.0; Y(4): 1.9; T(7): 48.1; T(17): 48.1; T(20): 1.9; S(24): 0.0; T(26): 0.0	6.51603e+06	0.006	0.04254	11.19	5.45154	4	2991.39	-1.19574	27.6412	0
AEGAATEEEGtPK	1	1	1	P80723	T11(Phospho)	0	T(6): 0.0; T(11): 100.0	1.18367e+07	0	1.485e-05	58.89	2.33711e-05	2	1369.55	-0.656646	10.8668	0
KAEGAATEEEGtPK	1	1	1	P80723	T12(Phospho)	0	T(7): 0.0; T(12): 100.0	6.14533e+06	0	0.0003322	52.39	0.000143903	2	1497.65	-0.844538	10.0774	1
ETPAATEAPSStPK	3	1	1	P80723	T12(Phospho)	0	T(2): 0.0; T(6): 0.0; S(10): 0.0; S(11): 1.2; T(12): 98.8	6.87512e+06	0	2.744e-05	51.12	0.000200897	2	1466.64	1.86421	13.4533	0
ETPAATEAPsSTPK	3	1	1	P80723	S10(Phospho)	0	T(2): 0.0; T(6): 0.0; S(10): 1.4; S(11): 1.4; T(12): 97.2	6.49866e+06	0	0.002874	19.77	0.277304	2	1466.65	4.61082	13.4699	0
NtGsISGPK	1	1	1	Q13621	T2(Phospho); S4(Phospho)	0	T(2): 100.0; S(4): 99.0; S(6): 1.0	1.44851e+08	0	0.004315	50.61	5.47445e-05	2	1020.38	0.186418	14.5192	0
NVAVtPSSADR	1	1	1	Q13621	T5(Phospho)	0	T(5): 100.0; S(7): 0.0; S(8): 0.0	1.77912e+07	0	0.00041	47.54	0.000304822	2	1196.53	0.447375	14.7563	0
IsFRPGNQEcYDNFLQSGETAK	1	1	1	Q13621	S2(Phospho); C10(Carbamidomethyl)	0	S(2): 100.0; Y(11): 0.0; S(17): 0.0; T(20): 0.0	4.12893e+07	0	0.0006632	47.29	0.00115622	3	2641.14	-0.164088	28.0085	0
NtGSISGPK	1	1	1	Q13621	T2(Phospho)	0	T(2): 100.0; S(4): 0.0; S(6): 0.0	2.61973e+07	0	0.01055	37.23	0.0027439	2	940.414	0.420802	11.3281	0
KDGsINTSQSMHVGEFNQK	1	1	1	Q13621	S4(Phospho)	0	S(4): 96.9; T(7): 1.0; S(8): 1.0; S(10): 1.0	0	0.001	0.01738	36.92	0.0105276	3	2186.96	0.891328	20.8586	1
nTGsISGPK	1	1	1	Q13621	N1(Deamidated); S4(Phospho)	0	T(2): 0.0; S(4): 99.9; S(6): 0.0	1.36355e+06	0.001	0.04374	30.39	0.0124776	2	941.397	-1.01366	12.9111	0
LVEAsTQFK	2	1	1	Q13621	S5(Phospho)	0	S(5): 50.0; T(6): 50.0	2.98843e+06	0.007	0.1711	32.02	0.0111794	2	1102.51	-3.05326	17.8528	0
IsFRPGnQEcYDNFLQSGETAK	1	1	1	Q13621	S2(Phospho); N7(Deamidated); C10(Carbamidomethyl)	0	S(2): 98.6; Y(11): 1.4; S(17): 0.0; T(20): 0.0	3.51044e+06	0.006	0.06391	18.09	0.908146	3	2642.12	-0.790478	29.439	0
KDGSINtSQSmHVGEFNQK	1	1	1	Q13621	T7(Phospho); M11(Oxidation)	0	S(4): 49.1; T(7): 49.1; S(8): 0.9; S(10): 0.9	1.92675e+07	0.009	0.07648	13.44	2.22146	3	2202.95	0.422514	15.7948	1
KDGSINTSQsMHVGEFNQK	4	1	1	Q13621	S10(Phospho)	0	S(4): 96.1; T(7): 1.3; S(8): 1.3; S(10): 1.3	3.67259e+07	0	0.003148	25.59	0.142032	3	2186.96	3.73801	21.2958	1
GSDsDSEGDNPEK	1	1	1	Q9UN37	S4(Phospho)	0	S(2): 0.0; S(4): 100.0; S(6): 0.0	6.07286e+07	0	5.72e-06	99.33	8.75107e-10	2	1416.48	1.79824	9.86431	0
GSDsDSEGDNPEKK	3	1	1	Q9UN37	S4(Phospho)	0	S(2): 0.0; S(4): 100.0; S(6): 0.0	5.45014e+07	0	3.202e-05	78.24	2.362e-07	2	1544.58	1.88666	9.18508	1
ENQSEGKGsDsDSEGDNPEK	2	1	1	Q9UN37	S9(Phospho); S11(Phospho)	0	S(4): 0.0; S(9): 98.1; S(11): 98.2; S(13): 3.7	1.79793e+07	0	0.002902	41.51	0.000988845	2	2268.79	2.19997	10.1752	1
ENQSEGKGsDsDSEGDNPEKK	2	1	1	Q9UN37	S9(Phospho); S11(Phospho)	0	S(4): 5.5; S(9): 97.2; S(11): 94.5; S(13): 2.8	1.55297e+07	0.001	0.02149	31.63	0.0177951	3	2396.89	4.11422	9.52623	2
ENQsEGKGSDSDSEGDNPEK	3	1	1	Q9UN37	S4(Phospho)	0	S(4): 33.1; S(9): 33.1; S(11): 33.1; S(13): 0.7	2.58262e+06	0.007	0.1616	18.23	0.34422	2	2188.82	1.28672	9.65685	1
ENQsEGKGsDSDSEGDNPEK	4	1	1	Q9UN37	S4(Phospho); S9(Phospho)	0	S(4): 100.0; S(9): 99.9; S(11): 0.1; S(13): 0.0	1.09128e+07	0	0.001949	38.52	0.00193332	2	2268.78	0.478231	10.077	1
GSDsDsEGDNPEKK	3	1	1	Q9UN37	S4(Phospho); S6(Phospho)	0	S(2): 50.4; S(4): 50.4; S(6): 99.1	3.83953e+06	0.001	0.008271	24.99	0.0253565	2	1624.54	1.40429	9.503	1
ENQsEGKGSDsDSEGDNPEKK	4	1	1	Q9UN37	S4(Phospho); S11(Phospho)	0	S(4): 0.0; S(9): 100.0; S(11): 100.0; S(13): 0.0	1.57651e+07	0	6.422e-05	67.85	4.24913e-06	3	2396.89	4.11422	9.34762	2
EsVAATPPPsPSLPAKPKPPSR	4	1	1	P98164	S2(Phospho); S10(Phospho)	0	S(2): 100.0; T(6): 0.1; S(10): 97.7; S(12): 2.2; S(21): 0.0	9.36675e+07	0	0.003683	30.53	0.0387681	4	2371.15	3.05575	21.1281	0
ESVAAtPPPsPSLPAKPKPPSR	4	1	1	P98164	T6(Phospho); S10(Phospho)	0.0476	S(2): 1.7; T(6): 98.3; S(10): 100.0; S(12): 0.0; S(21): 0.0	1.27755e+08	0	4.835e-16	40.02	0.00441462	3	2371.15	-0.284873	20.9372	0
ESVAAtPPPSPsLPAKPKPPSR	5	1	1	P98164	T6(Phospho); S12(Phospho)	0	S(2): 97.2; T(6): 2.8; S(10): 50.0; S(12): 50.0; S(21): 0.0	113031877	0	0.002926	12.71	2.37894	3	2371.15	0.48735	21.4295	0
sLEQGPEGPETPIQVVLR	2	1	1	Q96FN5	S1(Phospho)	0	S(1): 100.0; T(11): 0.0	1.95396e+08	0	0.000382	58.44	5.11291e-05	3	2029	1.63227	34.7412	0
SHSDWTQtR	1	1	1	Q96FN5	T8(Phospho)	0	S(1): 0.0; S(3): 0.0; T(6): 0.0; T(8): 100.0	1.64439e+07	0	0.01008	47.82	0.000237882	2	1197.47	1.08718	11.3084	0
GsPDGDLAR	2	1	1	Q96FN5	S2(Phospho)	0	S(2): 100.0	4.59754e+08	0	0.005644	45.2	0.000234046	2	967.389	0.554212	14.3742	0
sPGQVLPPH	3	1	1	Q96FN5	S1(Phospho)	0	S(1): 100.0	3.60522e+08	0	0.006805	44	0.000738489	2	1011.47	-0.515722	20.8245	0
RNsAHTLNQASSR	2	1	1	Q96FN5	S3(Phospho)	0	S(3): 100.0; T(6): 0.0; S(11): 0.0; S(12): 0.0	6.4255e+06	0	0.001836	35.35	0.0074832	3	1521.69	0.177098	10.1939	1
ERsHSDWTQTR	1	1	1	Q96FN5	S3(Phospho)	0	S(3): 100.0; S(5): 0.0; T(8): 0.0; T(10): 0.0	6235924	0.001	0.0184	45.17	0.000571686	3	1482.61	-0.127581	11.5481	1
NSAHTLNQAsSR	2	1	1	Q96FN5	S10(Phospho)	0	S(2): 0.0; T(5): 0.0; S(10): 50.0; S(11): 50.0	6.25554e+06	0.001	0.04262	25.52	0.0576517	2	1365.59	1.44748	10.0941	0
DLLSLGsPRPLPVR	2	1	1	Q96FN5	S7(Phospho)	0	S(4): 50.0; S(7): 50.0	3.00526e+07	0.001	0.04293	17.06	0.335525	2	1599.86	0.891669	31.7579	0
AsGLSGAR	1	1	1	Q96FN5	S2(Phospho)	0	S(2): 100.0; S(5): 0.0	1.35562e+07	0.003	0.1027	42.81	0.000578578	2	798.351	0.268481	10.8514	0
VLAEmLTEEEVVPSAPPLPVRPPKtSPGLR	1	1	1	Q96FN5	M5(Oxidation); T25(Phospho)	0	T(7): 0.0; S(14): 0.0; T(25): 50.0; S(26): 50.0	5.52309e+06	0.004	0.1139	10.75	1.67858	4	3305.72	-0.620773	31.1923	1
DQIGSsLR	1	1	1	Q96FN5	S6(Phospho)	0	S(5): 0.0; S(6): 100.0	1.15412e+07	0.005	0.1351	39.29	0.00190183	2	955.425	0.440664	16.674	0
GRsQPPcSEGAR	1	1	1	Q96FN5	S3(Phospho); C7(Carbamidomethyl)	0	S(3): 100.0; S(8): 0.0	5.92865e+06	0.007	0.1543	24.08	0.0703514	2	1381.57	2.21787	9.84777	1
VLAEMLTEEEVVPsAPPLPVRPPKTSPGLR	2	1	1	Q96FN5	S14(Phospho)	0	T(7): 0.0; S(14): 33.3; T(25): 33.3; S(26): 33.3	2.82416e+06	0.007	0.1538	15.1	0.546982	4	3289.73	0.724796	33.0613	1
sQPPcSEGAR	1	1	1	Q96FN5	S1(Phospho); C5(Carbamidomethyl)	0	S(1): 100.0; S(6): 0.0	1.84676e+07	0	7.708e-07	42.71	0.000661709	2	1168.44	-0.58935	10.2683	0
ASGLsGAR	2	1	1	Q96FN5	S5(Phospho)	0	S(2): 0.0; S(5): 100.0	1.87279e+07	0.001	0.005335	50.9	8.94114e-05	2	798.351	-0.0373256	11.372	0
SHsDWTQTR	3	1	1	Q96FN5	S3(Phospho)	0	S(1): 0.0; S(3): 100.0; T(6): 0.0; T(8): 0.0	3.86445e+07	0.001	0.01023	25.39	0.0383015	2	1197.47	0.679416	11.679	0
VTTRPQAPKsPVAK	1	1	1	Q96FN5	S10(Phospho)	0	T(2): 0.0; T(3): 0.0; S(10): 100.0	4.12344e+06	0.005	0.0607	11.35	1.50595	2	1559.83	1.34431	11.526	1
VRPmsAAELR	1	1	1	Q96FN5	M4(Oxidation); S5(Phospho)	0	S(5): 100.0	2.08045e+07	0.002	0.01992	23.09	0.113154	2	1225.58	1.20994	13.3904	0
NsAHTLNQASSR	1	1	1	Q96FN5	S2(Phospho)	0	S(2): 100.0; T(5): 0.0; S(10): 0.0; S(11): 0.0	3.4092e+06	0.002	0.01519	11.46	1.38612	2	1365.59	1.2687	9.95018	0
LSDSYSNtLPVR	1	1	1	Q9UQB8	T8(Phospho)	0	S(2): 0.0; S(4): 0.0; Y(5): 0.0; S(6): 0.0; T(8): 100.0	4.98076e+07	0	0.0007607	74.08	1.22333e-06	2	1431.66	2.86029	22.6534	0
AVQLMQQVASnGATLPSALSAsK	4	1	1	Q9UQB8	N11(Deamidated); S22(Phospho)	0	S(10): 0.0; T(14): 0.0; S(17): 0.0; S(20): 0.0; S(22): 100.0	2.04282e+07	0	0.0001104	67.16	8.43276e-06	3	2353.15	0.51387	32.6368	0
NSYATTENKtLPR	1	1	1	Q9UQB8	T10(Phospho)	0	S(2): 0.0; Y(3): 0.0; T(5): 0.0; T(6): 0.0; T(10): 100.0	4.56002e+06	0	0.002441	61.36	2.49318e-05	2	1574.72	1.34616	13.4574	1
QRPySVAVPAFSQGLDDYGAR	2	1	1	Q9UQB8	Y4(Phospho)	0	Y(4): 50.0; S(5): 50.0; S(12): 0.0; Y(18): 0.0	3.78088e+06	0	0.002819	31.11	0.0396912	3	2377.1	-0.315734	30.5268	0
SSsMAAGLER	2	1	1	Q9UQB8	S3(Phospho)	0	S(1): 0.0; S(2): 0.0; S(3): 100.0	3.84087e+07	0.001	0.02073	58.74	1.32991e-05	2	1088.44	0.111385	16.4253	0
NsYATTENK	1	1	1	Q9UQB8	S2(Phospho)	0	S(2): 100.0; Y(3): 0.0; T(5): 0.0; T(6): 0.0	2.24114e+06	0.001	0.02093	50.06	0.000131668	2	1107.43	-1.94789	10.3491	0
SLsPPQSQSK	1	1	1	Q9UQB8	S3(Phospho)	0	S(1): 0.8; S(3): 99.2; S(7): 0.0; S(9): 0.0	0	0.001	0.02608	39.26	0.00215217	2	1138.51	0.0468898	13.1671	0
SSsTGNLLDKDDLAIPPPDYGAASR	3	1	1	Q9UQB8	S3(Phospho)	0	S(1): 0.9; S(2): 0.9; S(3): 49.1; T(4): 49.1; Y(20): 0.0; S(24): 0.0	4.99944e+07	0.001	0.04036	16.99	1.23191	3	2640.22	0.888308	29.9084	1
AVQLmQQVASnGATLPSALSAsK	2	1	1	Q9UQB8	M5(Oxidation); N11(Deamidated); S22(Phospho)	0	S(10): 0.0; T(14): 0.0; S(17): 0.0; S(20): 1.7; S(22): 98.3	6.73601e+06	0.002	0.06066	24.63	0.144971	3	2369.15	5.25874	28.8557	0
QRPYsVAVPAFSQGLDDYGAR	1	1	1	Q9UQB8	S5(Phospho)	0	Y(4): 50.0; S(5): 50.0; S(12): 0.0; Y(18): 0.0	3.6958e+06	0	5.08e-08	31.03	0.0397585	3	2377.1	0.531585	30.7413	0
NyGQLDIFPAR	1	1	1	P15941	Y2(Phospho)	0	Y(2): 100.0	6.58231e+06	0	2.271e-05	56.07	6.72309e-05	2	1373.63	1.63987	30.8013	0
DTYHPMSEYPTYHtHGR	8	1	1	P15941	T14(Phospho)	0	T(2): 0.0; Y(3): 0.0; S(7): 0.0; Y(9): 0.0; T(11): 0.0; Y(12): 0.0; T(14): 100.0	1.13174e+08	0	0.0007149	36.08	0.00689258	3	2171.86	0.25134	21.6045	0
YVPPSSTDRSPyEK	2	1	1	P15941	Y12(Phospho)	0	Y(1): 0.0; S(5): 0.0; S(6): 0.0; T(7): 0.0; S(10): 1.3; Y(12): 98.7	3.63014e+07	0	0.0004172	23.85	0.142174	3	1705.75	-0.626435	12.2789	1
DTYHPmSEYPtYHTHGR	5	1	1	P15941	M6(Oxidation); T11(Phospho)	0	T(2): 0.0; Y(3): 0.0; S(7): 0.0; Y(9): 0.0; T(11): 100.0; Y(12): 0.0; T(14): 0.0	7.73307e+07	0	0.000166	18.34	0.477036	3	2187.86	0.704579	20.0547	0
DtYHPmSEYPTyHTHGR	5	1	1	P15941	T2(Phospho); M6(Oxidation); Y12(Phospho)	0	T(2): 49.1; Y(3): 49.1; S(7): 0.9; Y(9): 0.9; T(11): 49.5; Y(12): 49.5; T(14): 0.9	3.51343e+07	0	0.009927	14.04	0.913169	3	2267.83	1.34269	12.3262	0
VSAGnGGSsLSYTNPAVAATSANL	4	1	1	P15941	N5(Deamidated); S9(Phospho)	0	S(2): 95.4; S(8): 2.3; S(9): 2.3; S(11): 0.0; Y(12): 0.0; T(13): 0.0; T(20): 0.0; S(21): 0.0	1.47424e+08	0	0.004186	13.58	2.24966	2	2290.03	1.3496	37.4791	0
YVPPsSTDR	3	1	1	P15941	S5(Phospho)	0	Y(1): 0.0; S(5): 50.0; S(6): 50.0; T(7): 0.0	1.1772e+08	0.001	0.03218	36.15	0.00336085	2	1101.46	1.41072	12.375	0
DTYHPMSEYPtYHtHGR	4	1	1	P15941	T11(Phospho); T14(Phospho)	0	T(2): 0.0; Y(3): 0.0; S(7): 0.0; Y(9): 0.0; T(11): 98.9; Y(12): 1.1; T(14): 100.0	39145443	0.001	0.04552	35.33	0.00526095	3	2251.82	-2.74906	19.6853	0
YVPPSSTDRsPYEK	6	1	1	P15941	S10(Phospho)	0	Y(1): 0.0; S(5): 0.0; S(6): 0.0; T(7): 0.6; S(10): 99.4; Y(12): 0.0	74945871	0	1.702e-08	44.94	0.00113021	2	1705.75	1.81463	13.3791	1
DTYHPMSEYPtYHTHGR	8	1	1	P15941	T11(Phospho)	0	T(2): 0.0; Y(3): 0.0; S(7): 0.0; Y(9): 0.0; T(11): 100.0; Y(12): 0.0; T(14): 0.0	1.32511e+08	0	4.595e-11	44.87	0.000930264	3	2171.87	0.841495	21.4088	0
yVPPSSTDR	1	1	1	P15941	Y1(Phospho)	0	Y(1): 100.0; S(5): 0.0; S(6): 0.0; T(7): 0.0	3.1886e+07	0.003	0.03071	27.82	0.0249446	2	1101.46	0.191636	11.2215	0
DTYHPmSEYPTYHtHGR	7	1	1	P15941	M6(Oxidation); T14(Phospho)	0	T(2): 0.0; Y(3): 0.0; S(7): 0.0; Y(9): 0.0; T(11): 0.0; Y(12): 0.0; T(14): 100.0	1.11334e+08	0	7.574e-05	40.77	0.00266334	3	2187.86	-0.216029	20.0903	0
YVPPSsTDRSPYEK	4	1	1	P15941	S6(Phospho)	0	Y(1): 0.0; S(5): 0.5; S(6): 49.5; T(7): 49.5; S(10): 0.5; Y(12): 0.0	4.96227e+07	0	0.0004592	10	3.445	3	1705.75	0.66172	13.875	1
DTYHPMsEYPtYHTHGR	5	1	1	P15941	S7(Phospho); T11(Phospho)	0	T(2): 0.0; Y(3): 0.0; S(7): 100.0; Y(9): 0.0; T(11): 98.9; Y(12): 1.1; T(14): 0.0	4.58018e+07	0	6.785e-05	43.19	0.00086352	3	2251.83	0.340883	20.6431	0
DTYHPmSEYPtYHtHGR	1	1	1	P15941	M6(Oxidation); T11(Phospho); T14(Phospho)	0	T(2): 0.0; Y(3): 0.0; S(7): 0.0; Y(9): 0.0; T(11): 98.7; Y(12): 1.4; T(14): 100.0	3.5174e+07	0.002	0.01027	14.51	0.791184	3	2267.83	0.0508441	15.71	0
RVsGEPQQSGDGSLSPQAEAIEVAAGESAGR	1	1	1	Q96NY7	S3(Phospho)	0	S(3): 100.0; S(9): 0.0; S(13): 0.0; S(15): 0.0; S(28): 0.0	8.80933e+06	0	1.12e-05	66.87	1.54192e-05	3	3120.43	1.23469	26.933	1
sPEGPR	1	1	1	Q96NY7	S1(Phospho)	0	S(1): 100.0	1.29989e+06	0.007	0.1461	35	0.00294092	2	722.286	-1.12549	9.32769	0
DGTIsEDTIRASLISAVSDK	4	1	1	Q99816	S5(Phospho)	0	T(3): 0.6; S(5): 32.9; T(8): 32.9; S(12): 32.9; S(15): 0.6; S(18): 0.0	4.58275e+06	0.001	0.01442	25.71	0.128225	3	2158.03	0.32026	30.2577	1
DGtISEDTIR	4	1	1	Q99816	T3(Phospho)	0	T(3): 100.0; S(5): 0.0; T(8): 0.0	2.26189e+08	0	0.0009124	50.9	0.000154844	2	1186.5	1.98393	22.0908	0
DGTISEDtIR	2	1	1	Q99816	T8(Phospho)	0	T(3): 0.0; S(5): 0.0; T(8): 100.0	172694770	0.001	0.005845	46.74	0.000422613	2	1186.5	1.16087	17.2124	0
DHVyGIHNPVMTSPSQH	1	1	1	O43490	Y4(Phospho)	0	Y(4): 100.0; T(12): 0.0; S(13): 0.0; S(15): 0.0	1.83396e+07	0	1.812e-06	39.72	0.00403707	3	1998.85	0.201266	21.5385	0
DHVYGIHNPVmTSPsQH	1	1	1	O43490	M11(Oxidation); S15(Phospho)	0	Y(4): 0.0; T(12): 0.0; S(13): 0.0; S(15): 100.0	8.35355e+06	0.002	0.01572	17.02	0.759681	3	2014.85	0.239432	20.3829	0
APAEGVLtLR	1	1	1	Q9H6S3	T8(Phospho)	0	T(8): 100.0	3.46479e+07	0	0.0001271	68.5	3.28415e-06	2	1106.56	0.314836	24.7986	0
KAPAEGVLtLR	2	1	1	Q9H6S3	T9(Phospho)	0	T(9): 100.0	3.54697e+07	0	8.531e-05	61.79	1.30788e-05	2	1234.66	2.0624	23.4094	1
REsQEEPR	1	1	1	Q9H6S3	S3(Phospho)	0	S(3): 100.0	1.38396e+07	0	0.006703	49.13	0.000151503	2	1110.46	0.746829	9.1795	1
RREsQEEPR	2	1	1	Q9H6S3	S4(Phospho)	0	S(4): 100.0	2.38433e+07	0	0.004743	42.46	0.00104996	2	1266.56	0.715017	9.474	2
HSPTSEPTPPGDALPPVsSPHTHR	2	1	1	Q9H6S3	S18(Phospho)	0	S(2): 0.0; T(4): 1.4; S(5): 0.0; T(8): 0.0; S(18): 49.2; S(19): 49.2; T(22): 0.0	1.38135e+07	0.001	0.01683	18.68	0.748742	4	2581.19	1.15282	23.3501	0
GGDsPEAK	1	1	1	Q9H6S3	S4(Phospho)	0	S(4): 100.0	0	0.009	0.07753	14.94	0.112219	2	840.314	0.257049	0.947169	0
DKEVsDDEAEEK	1	1	1	P07900	S5(Phospho)	0	S(5): 100.0	4.78128e+06	0	0.01326	35.56	0.00361363	2	1473.55	-6.30845	10.2875	1
sAASSAVSSVGAR	1	1	1	Q13563	S1(Phospho)	0	S(1): 100.0; S(4): 0.0; S(5): 0.0; S(8): 0.0; S(9): 0.0	6.95012e+06	0	1.07e-05	83.19	9.78656e-08	2	1229.55	1.53913	15.2474	0
REDQGPPcPsPVGGGDPLHR	1	1	1	Q13563	C8(Carbamidomethyl); S10(Phospho)	0	S(10): 100.0	4.94441e+07	0	3.935e-06	24.06	0.179439	3	2207.96	-1.29975	20.8478	1
EDQGPPcPsPVGGGDPLHR	1	1	1	Q13563	C7(Carbamidomethyl); S9(Phospho)	0	S(9): 100.0	3.05056e+07	0	0.01246	21.6	0.240065	3	2051.86	-0.12698	20.2135	0
NTVDDIsESLR	1	1	1	Q13563	S7(Phospho)	0	T(2): 0.9; S(7): 98.2; S(9): 0.9	1.37791e+06	0.004	0.1291	36.17	0.00489131	2	1328.57	0.568856	20.8837	0
SAASsAVsSVGAR	4	1	1	Q13563	S5(Phospho); S8(Phospho)	0	S(1): 0.0; S(4): 1.8; S(5): 98.1; S(8): 50.0; S(9): 50.0	1.6104e+06	0.007	0.07828	15.28	0.461031	2	1309.52	-0.529535	18.2246	0
RQsVELHSPQSLPR	3	1	1	P41181	S3(Phospho)	0	S(3): 100.0; S(8): 0.0; S(11): 0.0	1.68364e+09	0	9.502e-07	56.55	7.62411e-05	3	1713.84	0.904078	21.1937	1
RQsVELHsPQSLPR	6	1	1	P41181	S3(Phospho); S8(Phospho)	0	S(3): 100.0; S(8): 100.0; S(11): 0.0	2.66255e+08	0	2.896e-05	45	0.00125384	3	1793.81	0.170777	17.4552	1
QsVELHSPQSLPR	2	1	1	P41181	S2(Phospho)	0	S(2): 100.0; S(7): 0.0; S(10): 0.0	2.29182e+07	0	0.002192	28.89	0.0388011	3	1557.74	-0.62157	20.5555	0
QsVELHsPQSLPR	1	1	1	P41181	S2(Phospho); S7(Phospho)	0	S(2): 100.0; S(7): 100.0; S(10): 0.0	5.79992e+06	0.001	0.01548	44.22	0.00118453	2	1637.71	1.0804	20.735	0
RQsVELHsPQsLPR	1	1	1	P41181	S3(Phospho); S8(Phospho); S11(Phospho)	0	S(3): 100.0; S(8): 100.0; S(11): 100.0	4.47805e+06	0.006	0.1402	26.92	0.0683888	3	1873.77	-0.890817	20.2987	1
RRQsVELHSPQSLPR	1	1	1	P41181	S4(Phospho)	0	S(4): 100.0; S(9): 0.0; S(12): 0.0	1.87631e+07	0	0.0002995	40.31	0.00215551	4	1869.94	-1.25939	25.3996	2
SGFSSVsVSR	1	1	1	P02538	S7(Phospho)	0	S(1): 0.0; S(4): 0.0; S(5): 0.8; S(7): 99.2; S(9): 0.0	4.96902e+06	0	0.0012	58.74	2.1185e-05	2	1092.47	-1.30125	17.6962	0
SAsSDTSEELNSQDSPPK	2	1	1	O14745	S3(Phospho)	0	S(1): 0.8; S(3): 99.2; S(4): 0.0; T(6): 0.0; S(7): 0.0; S(12): 0.0; S(15): 0.0	4.55168e+07	0	2.364e-07	80.26	2.97637e-07	2	1958.79	0.228949	15.8315	0
SAsSDTSEELnSQDSPPK	1	1	1	O14745	S3(Phospho); N11(Deamidated)	0	S(1): 0.0; S(3): 99.2; S(4): 0.8; T(6): 0.0; S(7): 0.0; S(12): 0.0; S(15): 0.0	4.26151e+06	0.001	0.005449	38.69	0.00385341	2	1959.77	-2.20408	16.2086	0
KFQEQEcPPsPEPTR	2	1	1	P62070	C7(Carbamidomethyl); S10(Phospho)	0	S(10): 100.0; T(14): 0.0	4.48826e+07	0	2.243e-06	89.54	4.40802e-08	2	1909.83	7.61908	14.5378	1
FQEQEcPPsPEPTR	2	1	1	P62070	C6(Carbamidomethyl); S9(Phospho)	0	S(9): 100.0; T(13): 0.0	8.20501e+07	0	2.806e-06	87.61	4.69861e-08	2	1781.72	-0.123515	16.4391	0
FQEQEcPPsPEPTRK	2	1	1	P62070	C6(Carbamidomethyl); S9(Phospho)	0	S(9): 100.0; T(13): 0.0	2.51205e+07	0	0.001048	38.62	0.00524884	3	1909.82	0.485312	13.7727	1
KFQEQEcPPsPEPTRK	1	1	1	P62070	C7(Carbamidomethyl); S10(Phospho)	0	S(10): 100.0; T(14): 0.0	12595869	0.001	0.03744	29.91	0.0413991	3	2037.91	0.425202	14.8493	2
ETTcSKEsNEELTEScETK	1	1	1	P01042	C4(Carbamidomethyl); S8(Phospho); C16(Carbamidomethyl)	0	T(2): 0.0; T(3): 0.0; S(5): 0.0; S(8): 98.9; T(13): 1.1; S(15): 0.0; T(18): 0.0	1.05384e+07	0	0.0001178	77.49	5.13325e-07	2	2341.91	1.46053	12.0425	1
EsNEELTEScETK	1	1	1	P01042	S2(Phospho); C10(Carbamidomethyl)	0	S(2): 100.0; T(7): 0.0; S(9): 0.0; T(12): 0.0	2.31311e+06	0	0.0002505	40.66	0.00124557	2	1635.61	2.58901	14.2516	0
ETtcSKESNEELTEScETKK	1	1	1	P01042	T3(Phospho); C4(Carbamidomethyl); C16(Carbamidomethyl)	0	T(2): 98.4; T(3): 1.6; S(5): 0.0; S(8): 0.0; T(13): 0.0; S(15): 0.0; T(18): 0.0	3.54955e+06	0.007	0.1526	20.61	0.374956	3	2470	1.0831	11.2591	2
ETTcSKEsNEELTEScETKK	2	1	1	P01042	C4(Carbamidomethyl); S8(Phospho); C16(Carbamidomethyl)	0	T(2): 0.0; T(3): 1.2; S(5): 97.7; S(8): 1.2; T(13): 0.0; S(15): 0.0; T(18): 0.0	1.59288e+08	0	1.579e-05	59.78	2.7877e-05	3	2470	1.15723	18.4903	2
ETtcSKESNEELTEScETK	2	1	1	P01042	T3(Phospho); C4(Carbamidomethyl); C16(Carbamidomethyl)	0.0182	T(2): 1.1; T(3): 97.7; S(5): 0.0; S(8): 1.1; T(13): 0.0; S(15): 0.0; T(18): 0.0	1.38205e+07	0	1.19e-12	53.93	0.000115102	2	2341.91	0.730789	12.0264	1
GKDsYETSQLDDQsAETHSHK	13	1	1	P10451	S4(Phospho); S14(Phospho)	0	S(4): 100.0; Y(5): 0.0; T(7): 0.0; S(8): 0.0; S(14): 100.0; T(17): 0.0; S(19): 0.0	1.63995e+08	0	9.8e-08	89.6	3.70061e-08	3	2522.97	0.115839	12.3138	1
RPDIQYPDATDEDITsHMEsEELnGAYK	4	1	1	P10451	S16(Phospho); S20(Phospho); N24(Deamidated)	0	Y(6): 0.0; T(10): 0.0; T(15): 50.5; S(16): 50.5; S(20): 99.1; Y(27): 0.0	2.30277e+07	0	3.351e-05	56.29	0.000136749	3	3385.35	-0.694864	28.1425	0
RPDIQYPDAtDEDItSHMEsEELnGAYK	4	1	1	P10451	T10(Phospho); T15(Phospho); S20(Phospho); N24(Deamidated)	0	Y(6): 3.7; T(10): 74.1; T(15): 74.1; S(16): 74.1; S(20): 74.1; Y(27): 0.0	1.09205e+07	0	0.004201	17.56	0.79977	3	3465.32	0.970342	29.9783	0
GKDSYETsQLDDQSAETHSHK	6	1	1	P10451	S8(Phospho)	0	S(4): 0.0; Y(5): 0.4; T(7): 49.6; S(8): 49.6; S(14): 0.4; T(17): 0.0; S(19): 0.0	5.25134e+07	0	2.137e-05	53.5	0.000206144	3	2443.01	1.52788	18.5897	1
GKDSYEtsQLDDQsAETHSHK	1	1	1	P10451	T7(Phospho); S8(Phospho); S14(Phospho)	0	S(4): 100.0; Y(5): 0.1; T(7): 50.0; S(8): 50.0; S(14): 100.0; T(17): 0.0; S(19): 0.0	5.29975e+07	0	8.183e-06	48.61	0.000274753	3	2602.93	-2.61637	13.3548	1
AIPVAQDLNAPSDWDsR	2	1	1	P10451	S16(Phospho)	0	S(12): 0.0; S(16): 100.0	9.12694e+07	0	6.381e-05	41.6	0.00299909	2	1934.87	1.16521	29.9878	0
RPDIQYPDAtDEDItsHMESEELnGAYK	1	1	1	P10451	T10(Phospho); T15(Phospho); S16(Phospho); N24(Deamidated)	0	Y(6): 0.1; T(10): 75.0; T(15): 75.0; S(16): 75.0; S(20): 75.0; Y(27): 0.0	9.93318e+06	0	0.005197	29.39	0.0504626	3	3465.31	-1.46028	30.0824	0
QNLLAPQNAVssEETNDFK	2	1	1	P10451	S11(Phospho); S12(Phospho)	0	S(11): 100.0; S(12): 100.0; T(15): 0.1	2.0016e+07	0	0.008321	26.08	0.112945	2	2264.95	1.72903	32.6608	0
RPDIQYPDAtDEDITSHmEsEELnGAYK	6	1	1	P10451	T10(Phospho); M18(Oxidation); S20(Phospho); N24(Deamidated)	0	Y(6): 1.6; T(10): 49.6; T(15): 49.6; S(16): 49.6; S(20): 49.6; Y(27): 0.0	1.84377e+07	0	0.009602	25.08	0.188912	3	3401.35	0.300958	24.7127	0
ISHELDsASSEVN	3	1	1	P10451	S7(Phospho)	0	S(2): 0.0; S(7): 98.1; S(9): 0.9; S(10): 0.9	4.03896e+06	0.001	0.02006	28.88	0.0243309	2	1467.6	1.28914	16.3029	0
DSYETSQLDDQsAETHSHK	3	1	1	P10451	S12(Phospho)	0	S(2): 1.0; Y(3): 1.0; T(5): 48.0; S(6): 1.0; S(12): 48.0; T(15): 1.0; S(17): 0.0	1.34819e+07	0.001	0.01577	25.42	0.0988984	2	2257.89	-0.94264	13.026	0
DSYETSQLDDQsAETHSHKQSR	3	1	1	P10451	S12(Phospho)	0	S(2): 0.0; Y(3): 0.0; T(5): 0.0; S(6): 0.0; S(12): 100.0; T(15): 0.0; S(17): 0.0; S(21): 0.0	2.92762e+08	0	8.456e-07	87.26	5.7883e-08	3	2629.09	4.05349	21.1488	1
GKDSYETSQLDDQsAETHSHKQSR	4	1	1	P10451	S14(Phospho)	0	S(4): 0.0; Y(5): 0.0; T(7): 0.0; S(8): 0.0; S(14): 100.0; T(17): 0.0; S(19): 0.0; S(23): 0.0	6.75302e+08	0	5.671e-07	85.07	1.13733e-07	3	2814.2	2.12222	16.7564	2
GKDsYETSQLDDQSAETHSHK	4	1	1	P10451	S4(Phospho)	0.0213	S(4): 98.0; Y(5): 2.0; T(7): 0.0; S(8): 0.0; S(14): 0.0; T(17): 0.0; S(19): 0.0	6.08561e+07	0	2.492e-07	45.67	0.00119113	4	2443	-1.12589	17.2217	1
KANDESNEHSDVIDsQELSKVSR	2	1	1	P10451	S15(Phospho)	0	S(6): 0.0; S(10): 0.0; S(15): 100.0; S(19): 0.0; S(22): 0.0	4.71729e+07	0	7.96e-11	78.57	5.27487e-07	3	2667.19	0.207819	31.6707	2
ISHELDSAsSEVN	2	1	1	P10451	S9(Phospho)	0	S(2): 0.0; S(7): 33.3; S(9): 33.3; S(10): 33.3	0	0	0.001582	26.51	0.0418795	2	1467.6	0.374193	16.3005	0
KANDESNEHSDVIDsQELSK	4	1	1	P10451	S15(Phospho)	0	S(6): 0.0; S(10): 0.0; S(15): 100.0; S(19): 0.0	1.81947e+08	0	7.891e-07	57.52	5.46079e-05	3	2324.99	0.777169	27.7021	1
RKANDESNEHSDVIDsQELSK	6	1	1	P10451	S16(Phospho)	0	S(7): 0.0; S(11): 0.0; S(16): 100.0; S(20): 0.0	2.40953e+08	0	1.698e-07	49.93	0.000365341	3	2481.1	2.55483	23.2149	2
AIPVAQDLNAPSDWDsRGK	2	1	1	P10451	S16(Phospho)	0	S(12): 0.0; S(16): 100.0	128395356	0	0.00053	47.53	0.000575728	3	2119.98	-0.576824	50.9542	1
GKDSyETSQLDDQsAETHSHKQSR	3	1	1	P10451	Y5(Phospho); S14(Phospho)	0	S(4): 100.0; Y(5): 0.0; T(7): 0.0; S(8): 0.0; S(14): 100.0; T(17): 0.0; S(19): 0.0; S(23): 0.0	1.18902e+08	0	0.0001049	45.01	0.000930726	3	2894.16	-1.97217	19.2665	2
FRIsHELDSASSEVN	10	1	1	P10451	S4(Phospho)	0	S(4): 100.0; S(9): 0.0; S(11): 0.0; S(12): 0.0	1.62806e+09	0	0.0005128	42.03	0.00151327	2	1770.77	0.456847	44.2537	1
sKEEDKHLK	2	1	1	P10451	S1(Phospho)	0	S(1): 100.0	4.361e+08	0	0.01778	36.13	0.00413209	2	1193.56	0.987255	2.33299	2
ANDEsNEHSDVIDSQELSK	1	1	1	P10451	S5(Phospho)	0	S(5): 100.0; S(9): 0.0; S(14): 0.0; S(18): 0.0	9.92553e+06	0	0.00203	34.31	0.00935969	2	2196.9	2.96753	34.6007	0
DSyETSQLDDQsAETHSHKQSR	1	1	1	P10451	Y3(Phospho); S12(Phospho)	0	S(2): 50.0; Y(3): 50.0; T(5): 0.0; S(6): 0.0; S(12): 100.0; T(15): 0.0; S(17): 0.0; S(21): 0.0	3.24296e+07	0	0.02027	33.35	0.00980248	3	2709.04	-2.94612	24.1623	1
EFHSHEFHsHEDmLVVDPK	2	1	1	P10451	S9(Phospho); M13(Oxidation)	0	S(4): 0.0; S(9): 100.0	3.15794e+07	0	0.0005707	32.62	0.0163011	4	2416.01	-0.297718	30.126	0
QNLLAPQNAVsSEETNDFKQETLPSK	2	1	1	P10451	S11(Phospho)	0	S(11): 50.0; S(12): 50.0; T(15): 0.0; T(22): 0.0; S(25): 0.0	2.81607e+07	0	0.001461	32.31	0.0224127	3	2968.39	0.341994	51.4804	1
RKANDEsNEHSDVIDsQELSK	1	1	1	P10451	S7(Phospho); S16(Phospho)	0	S(7): 100.0; S(11): 0.0; S(16): 100.0; S(20): 0.0	3.46124e+07	0	0.001551	29.38	0.035584	3	2561.06	0.202268	26.8394	2
RPDIQYPDATDEDITsHmEsEELNGAYK	1	1	1	P10451	S16(Phospho); M18(Oxidation); S20(Phospho)	0	Y(6): 2.7; T(10): 97.2; T(15): 2.6; S(16): 2.7; S(20): 94.7; Y(27): 0.1	0	0	0.001978	26.66	0.0666743	3	3400.35	-2.49698	49.5663	1
FRRPDIQYPDATDEDItSHmESEELNGAYK	2	1	1	P10451	T17(Phospho); M20(Oxidation)	0	Y(8): 0.0; T(12): 0.0; T(17): 50.0; S(18): 50.0; S(22): 0.0; Y(29): 0.0	35503627	0	0.003124	26.02	0.0976385	4	3623.55	-4.71139	44.5621	2
KANDEsNEHSDVIDsQELSK	1	1	1	P10451	S6(Phospho); S15(Phospho)	0	S(6): 100.0; S(10): 0.0; S(15): 100.0; S(19): 0.0	2.14044e+07	0	0.002569	29.09	0.0276832	3	2404.95	-0.526935	32.2776	1
AIPVAQDLNAPSDWDSRGKDSYETSQLDDQsAETHSHK	1	1	1	P10451	S31(Phospho)	0	S(12): 0.0; S(16): 0.0; S(21): 0.0; Y(22): 0.0; T(24): 0.0; S(25): 0.0; S(31): 99.9; T(34): 0.1; S(36): 0.0	1.70391e+08	0	0.002247	25.76	0.111892	3	4278.89	0.898542	43.8248	2
FRIsHELDSAsSEVN	1	1	1	P10451	S4(Phospho); S11(Phospho)	0	S(4): 100.0; S(9): 0.0; S(11): 100.0; S(12): 0.0	8.4646e+07	0.001	0.05113	58.56	2.59824e-05	2	1850.74	0.688831	49.759	1
RPDIQYPDAtDEDITSHMESEELNGAYK	1	1	1	P10451	T10(Phospho)	0	Y(6): 0.1; T(10): 96.6; T(15): 0.1; S(16): 0.1; S(20): 3.1; Y(27): 0.0	1.82273e+06	0.001	0.06883	10.36	3.54373	3	3304.39	-1.77424	51.2053	1
RPDIQYPDATDEDITsHmEsEELnGAYK	6	1	1	P10451	S16(Phospho); M18(Oxidation); S20(Phospho); N24(Deamidated)	0	Y(6): 0.0; T(10): 50.0; T(15): 50.0; S(16): 50.0; S(20): 50.0; Y(27): 0.0	2.8201e+07	0	4.835e-16	54.37	0.000223378	3	3401.35	0.731623	24.7475	0
GKDsyETSQLDDQsAETHSHK	7	1	1	P10451	S4(Phospho); Y5(Phospho); S14(Phospho)	0.0444	S(4): 98.1; Y(5): 1.9; T(7): 50.0; S(8): 50.0; S(14): 100.0; T(17): 0.0; S(19): 0.0	6.44997e+07	0	4.835e-16	43.45	0.000933083	3	2602.93	-2.0536	13.3773	1
RPDIQYPDATDEDItsHMEsEELnGAYK	1	1	1	P10451	T15(Phospho); S16(Phospho); S20(Phospho); N24(Deamidated)	0	Y(6): 0.0; T(10): 0.3; T(15): 99.9; S(16): 99.9; S(20): 99.9; Y(27): 0.0	1.49315e+07	0	1.951e-10	29.06	0.0551914	3	3465.31	-1.14324	29.9988	0
QNLLAPQNAVssEETNDFKQETLPSK	3	1	1	P10451	S11(Phospho); S12(Phospho)	0	S(11): 6.8; S(12): 6.8; T(15): 93.0; T(22): 90.9; S(25): 2.4	1.02919e+07	0	5.871e-13	20.85	0.615038	3	3048.36	0.826229	29.0935	1
DSYEtSQLDDQsAETHSHK	2	1	1	P10451	T5(Phospho); S12(Phospho)	0	S(2): 0.0; Y(3): 1.1; T(5): 49.4; S(6): 49.4; S(12): 97.7; T(15): 2.3; S(17): 0.0	3.90804e+06	0	3.874e-06	12.13	1.26144	3	2337.84	-4.92018	14.6286	0
ISHELDsAsSEVN	2	1	1	P10451	S7(Phospho); S9(Phospho)	0	S(2): 0.0; S(7): 100.0; S(9): 50.0; S(10): 50.0	5.38331e+06	0.001	0.007245	29.5	0.0131837	2	1547.56	-1.55272	21.2439	0
EFHsHEFHsHEDMLVVDPK	1	1	1	P10451	S4(Phospho); S9(Phospho)	0	S(4): 100.0; S(9): 100.0	1.24754e+07	0.001	0.00535	25.6	0.0966734	4	2479.98	0.210067	25.5785	0
sVDFDSLtVR	1	1	1	Q9Y5K6	S1(Phospho); T8(Phospho)	0	S(1): 100.0; S(6): 0.0; T(8): 100.0	1.83068e+06	0	0.01072	59.98	1.49185e-05	2	1298.51	0.035499	34.3011	0
SVDFDSLtVR	2	1	1	Q9Y5K6	T8(Phospho)	0	S(1): 0.0; S(6): 0.0; T(8): 100.0	6.29923e+07	0	0.004826	43.97	0.000829794	2	1218.54	0.0562163	27.6122	0
TQsVEITK	1	1	1	Q9Y5K6	S3(Phospho)	0	T(1): 0.0; S(3): 100.0; T(7): 0.0	3.81066e+06	0.001	0.02665	53.31	7.27989e-05	2	985.46	-0.320494	13.9137	0
FnGGHsPTHSPEK	1	1	1	Q9Y5K6	N2(Deamidated); S6(Phospho)	0	S(6): 99.0; T(8): 0.0; S(10): 1.0	9.82294e+06	0.001	0.02249	37.89	0.00300727	2	1475.6	0.739162	10.4242	0
TSsSETEEKKPEKPLILQSLGPK	3	1	1	Q9Y5K6	S3(Phospho)	0	T(1): 0.5; S(2): 0.5; S(3): 33.0; S(4): 33.0; T(6): 33.0; S(19): 0.0	0	0.001	0.02435	24.95	0.0823715	4	2606.34	3.96875	26.1541	1
KNsLDELR	1	1	1	Q9Y5K6	S3(Phospho)	0	S(3): 100.0	3.7478e+06	0.003	0.106	40.06	0.00232762	2	1054.49	1.09422	13.9676	1
ANtTAFLTPLEIK	2	1	1	Q9Y5K6	T3(Phospho)	0	T(3): 98.9; T(4): 1.1; T(8): 0.0	1.66215e+06	0.001	0.005335	27.76	0.0362625	2	1498.76	3.87233	35.5393	0
sVDFDSLTVR	2	1	1	Q9Y5K6	S1(Phospho)	0	S(1): 100.0; S(6): 0.0; T(8): 0.0	5.87114e+07	0	7.155e-06	49.83	0.000215263	2	1218.54	0.0562163	29.878	0
sVDFDsLTVR	2	1	1	Q9Y5K6	S1(Phospho); S6(Phospho)	0	S(1): 100.0; S(6): 50.0; T(8): 50.0	1.09421e+06	0.004	0.02506	24.76	0.0397692	2	1298.5	-1.65665	34.1494	0
KDPsQESEENTAAVR	3	1	1	Q8WWT9	S4(Phospho)	0	S(4): 100.0; S(7): 0.0; T(11): 0.0	1.50106e+07	0	7.575e-06	113.56	1.38775e-10	2	1740.75	1.82765	11.3596	1
KDPsQEsEENTAAVR	1	1	1	Q8WWT9	S4(Phospho); S7(Phospho)	0	S(4): 97.9; S(7): 97.9; T(11): 4.2	1.79434e+06	0.003	0.08167	16.35	0.544588	3	1820.71	-2.16095	12.3447	1
LPDsDDDEDEETAIQR	1	1	1	Q96K21	S4(Phospho)	0	S(4): 100.0; T(12): 0.0	5.87344e+07	0	1.248e-08	88.08	3.85101e-08	2	1927.74	0.0134477	20.2079	0
EHQTSAYsPPR	1	1	1	Q96K21	S8(Phospho)	0	T(4): 0.0; S(5): 0.0; Y(7): 0.8; S(8): 99.2	8.4358e+06	0	0.0004888	51.99	0.000126482	2	1352.56	-0.139358	12.0509	0
WsPPQnYK	1	1	1	Q96K21	S2(Phospho); N6(Deamidated)	0	S(2): 100.0; Y(7): 0.0	2.31021e+06	0.008	0.1763	20.59	0.100828	2	1100.44	-0.560532	21.1602	0
SISsVNVDELR	1	1	1	Q1MSJ5	S4(Phospho)	0	S(1): 0.0; S(3): 0.0; S(4): 100.0	8.83016e+06	0	0.0007818	65.98	6.90172e-06	2	1298.6	-0.218666	25.4022	0
LLHmDsDDEIPIR	2	1	1	Q1MSJ5	M4(Oxidation); S6(Phospho)	0	S(6): 100.0	1.45043e+07	0	0.005476	46.2	0.000773624	2	1649.72	0.160956	24.1924	0
LLHMDsDDEIPIR	1	1	1	Q1MSJ5	S6(Phospho)	0	S(6): 100.0	5.72687e+06	0	0.01036	35.02	0.0100413	3	1633.73	-0.567208	28.0765	0
DVLtPSEAYEELLNQR	4	1	1	Q1MSJ5	T4(Phospho)	0	T(4): 99.0; S(6): 1.0; Y(9): 0.0	7.13232e+06	0	0.01089	30.19	0.036852	2	1956.9	-0.0179723	38.3669	0
VDLDAIPsAK	1	1	1	Q1MSJ5	S8(Phospho)	0	S(8): 100.0	3.53161e+07	0	0.005616	29.54	0.0199556	2	1108.53	0.303071	24.2741	0
KDVLtPSEAYEELLNQR	2	1	1	Q1MSJ5	T5(Phospho)	0	T(5): 98.7; S(7): 1.3; Y(10): 0.0	7.40813e+06	0	0.008999	28.46	0.0607309	3	2084.99	1.14796	31.8965	1
QPsPIVPALQNK	1	1	1	Q1MSJ5	S3(Phospho)	0	S(3): 100.0	2.09839e+07	0	0.008569	24.94	0.0697364	2	1371.71	1.27677	25.1926	0
AQsPPVPAR	1	1	1	Q1MSJ5	S3(Phospho)	0	S(3): 100.0	4.37192e+07	0.001	0.03634	39.16	0.00180188	2	1002.48	0.103753	14.3038	0
LQRPPsVDSIIR	1	1	1	Q1MSJ5	S6(Phospho)	0	S(6): 100.0; S(9): 0.0	5.39917e+06	0.001	0.01953	25.88	0.0573262	3	1460.76	-0.224434	25.7296	0
VAASGAQDPEKsPDR	1	1	1	Q1MSJ5	S12(Phospho)	0	S(4): 0.0; S(12): 100.0	2.38204e+06	0.002	0.06979	32.79	0.0159383	2	1607.71	0.247724	10.6901	1
SFIHEsSMSR	3	1	1	Q1MSJ5	S6(Phospho)	0	S(1): 0.0; S(6): 98.1; S(7): 0.9; S(9): 0.9	3.91682e+06	0.002	0.06464	27.97	0.0264916	2	1260.51	1.02385	15.2543	0
SGLsSALGEMVSPR	2	1	1	Q1MSJ5	S4(Phospho)	0	S(1): 0.9; S(4): 49.5; S(5): 49.5; S(12): 0.0	1.16819e+06	0.002	0.06858	14.23	1.11761	2	1470.67	0.939456	33.5627	0
sISsVNVDELR	1	1	1	Q1MSJ5	S1(Phospho); S4(Phospho)	0	S(1): 50.4; S(3): 50.4; S(4): 99.3	1.53347e+06	0.003	0.08789	31.29	0.0157892	2	1378.57	3.05406	31.5177	0
DDPLEHcVsPR	1	1	1	Q1MSJ5	C7(Carbamidomethyl); S9(Phospho)	0	S(9): 100.0	3.51526e+06	0.006	0.05028	23.69	0.0761062	2	1404.56	-0.237473	17.1823	0
LQRPPsVDsIIR	1	1	1	Q1MSJ5	S6(Phospho); S9(Phospho)	0	S(6): 100.0; S(9): 100.0	1.61082e+07	0.007	0.08185	33.77	0.0138101	2	1540.74	7.09022	28.958	0
SFIHEsSmSR	3	1	1	Q1MSJ5	S6(Phospho); M8(Oxidation)	0	S(1): 0.0; S(6): 33.3; S(7): 33.3; S(9): 33.3	3.75525e+06	0.006	0.04488	23.61	0.0566165	2	1276.51	3.56012	12.5509	0
SGLSSALGEMVsPR	1	1	1	Q1MSJ5	S12(Phospho)	0	S(1): 0.0; S(4): 0.0; S(5): 0.0; S(12): 100.0	2.43547e+06	0.002	0.01058	25.66	0.0791842	2	1470.66	-1.13563	29.7773	0
SFIHESsMSR	1	1	1	Q1MSJ5	S7(Phospho)	0	S(1): 0.0; S(6): 1.0; S(7): 98.0; S(9): 1.0	3.56217e+06	0.005	0.03347	30.72	0.0153348	2	1260.51	-1.10668	15.1851	0
SIssVNVDELR	1	1	1	Q1MSJ5	S3(Phospho); S4(Phospho)	0	S(1): 2.1; S(3): 98.9; S(4): 98.9	2.3788e+06	0	7.493e-05	37.72	0.00360064	2	1378.57	1.54874	31.4842	0
ATIsDEEIER	1	1	1	Q9UQN3	S4(Phospho)	0	T(2): 0.0; S(4): 100.0	2.86436e+08	0	0.003106	66.6	3.80671e-06	2	1242.52	-0.836137	17.1254	0
MAGAMsTTAK	1	1	1	Q9UQN3	S6(Phospho)	0	S(6): 99.1; T(7): 0.9; T(8): 0.0	2.33461e+06	0	0.004349	62.31	6.16864e-06	2	1048.42	0.323912	13.1637	0
mAGAMsTTAK	2	1	1	Q9UQN3	M1(Oxidation); S6(Phospho)	0	S(6): 49.7; T(7): 49.7; T(8): 0.6	1.29825e+06	0	0.01216	29.67	0.0148895	2	1064.42	0.394313	11.2166	0
SLPsASTSK	4	1	1	Q9UQN3	S4(Phospho)	0	S(1): 0.0; S(4): 0.0; S(6): 99.2; T(7): 0.8; S(8): 0.0	3.82817e+08	0.001	0.033	41.23	0.001292	2	957.43	0.806079	12.2358	0
SLPSAStSK	2	1	1	Q9UQN3	T7(Phospho)	0	S(1): 0.0; S(4): 0.0; S(6): 0.9; T(7): 98.2; S(8): 0.9	9.83125e+07	0.003	0.03708	35.51	0.00472399	2	957.429	-0.277654	11.7921	0
sLPSASTSK	2	1	1	Q9UQN3	S1(Phospho)	0	S(1): 100.0; S(4): 0.0; S(6): 0.0; T(7): 0.0; S(8): 0.0	1.10514e+08	0.005	0.03822	31.71	0.012209	2	957.431	1.69856	12.9152	0
sSEHENAYENVPEEEGK	4	1	1	Q13113	S1(Phospho)	0	S(1): 50.0; S(2): 50.0; Y(8): 0.0	20649186	0	0.001374	21.61	0.176701	3	2027.79	-0.369603	14.3202	0
YSSmAAsFR	1	1	1	Q13113	M4(Oxidation); S7(Phospho)	0	Y(1): 0.0; S(2): 0.0; S(3): 0.0; S(7): 100.0	2.54005e+07	0.002	0.05874	51.53	6.04642e-05	2	1115.42	-2.8456	15.1163	0
YSSMAAsFR	2	1	1	Q13113	S7(Phospho)	0	Y(1): 0.0; S(2): 0.0; S(3): 0.0; S(7): 100.0	3.13626e+07	0.002	0.05997	48.7	0.000171993	2	1099.42	-5.62463	18.8823	0
ySSMAASFR	3	1	1	Q13113	Y1(Phospho)	0	Y(1): 50.0; S(2): 50.0; S(3): 0.0; S(7): 0.0	3.2162e+07	0	0.0013	33.42	0.00411764	2	1099.43	0.815184	18.2848	0
YSsMAASFR	1	1	1	Q13113	S3(Phospho)	0	Y(1): 0.0; S(2): 0.0; S(3): 100.0; S(7): 0.0	2.82787e+06	0.001	0.006854	52.56	5.76811e-05	2	1099.43	-0.628216	20.4892	0
SSEHENAyENVPEEEGK	1	1	1	Q13113	Y8(Phospho)	0	S(1): 0.0; S(2): 0.0; Y(8): 100.0	5.7671e+06	0	0.001374	26.66	0.0597695	2	2027.8	6.55985	12.2265	0
AAGEGLLtLR	1	1	1	Q8TE68	T8(Phospho)	0	T(8): 100.0	5.5769e+07	0	0.0002597	56.73	3.60952e-05	2	1080.55	0.232581	27.7274	0
SPAAEtPPLQR	1	1	1	Q8TE68	T6(Phospho)	0	S(1): 0.0; T(6): 100.0	6.3865e+07	0	0.00124	49.52	0.000268047	2	1246.58	-0.3845	16.0137	0
DRSPAAEtPPLQR	2	1	1	Q8TE68	T8(Phospho)	0	S(3): 0.0; T(8): 100.0	3.72851e+07	0	0.001203	41.92	0.00196984	3	1517.71	0.467614	15.2655	1
DRsPAAEtPPLQR	2	1	1	Q8TE68	S3(Phospho); T8(Phospho)	0	S(3): 100.0; T(8): 100.0	1.78598e+07	0	0.00476	26.16	0.0593152	3	1597.67	-1.59455	16.8211	1
AVIStVER	1	1	1	Q8TE68	T5(Phospho)	0	S(4): 0.0; T(5): 100.0	2.13639e+07	0.003	0.1011	42.03	0.00117177	2	954.465	-0.328671	15.7047	0
WDscDSLnGLDPSEK	2	1	1	Q8TE68	S3(Phospho); C4(Carbamidomethyl); N8(Deamidated)	0	S(3): 50.0; S(6): 50.0; S(13): 0.0	3.65857e+06	0.001	0.01125	21.41	0.141301	2	1803.68	1.2425	26.1865	0
DRsPAAETPPLQR	1	1	1	Q8TE68	S3(Phospho)	0	S(3): 100.0; T(8): 0.0	6.95646e+06	0	0.004085	14.35	1.10552	2	1517.71	0.154752	15.5336	1
APPPSLTDcIGtVDSR	3	1	1	Q9NZZ3	C9(Carbamidomethyl); T12(Phospho)	0	S(5): 0.0; T(7): 0.0; T(12): 100.0; S(15): 0.0	3.12474e+07	0	0.000771	50.13	0.000334341	3	1765.78	-0.436498	25.0508	0
DNLAQQSFNMEQANyTIQSLK	2	1	1	Q9NZZ3	Y15(Phospho)	0	S(7): 0.0; Y(15): 98.9; T(16): 1.1; S(19): 0.0	6.92239e+06	0	0.0004731	43.59	0.00257263	3	2523.12	-0.268378	33.3961	0
DNLAQQSFNMEQANYtIQSLK	6	1	1	Q9NZZ3	T16(Phospho)	0	S(7): 0.0; Y(15): 1.3; T(16): 98.7; S(19): 0.0	7.46949e+06	0	1.77e-09	39.73	0.00625184	3	2523.12	0.820186	32.1888	0
APPPsLTDcIGTVDSR	8	1	1	Q9NZZ3	S5(Phospho); C9(Carbamidomethyl)	0	S(5): 49.7; T(7): 49.7; T(12): 0.6; S(15): 0.0	4.29638e+07	0.001	0.0102	16.25	0.813381	2	1765.78	-0.463449	26.4817	0
DNLAQQSFNmEQANYtIQSLK	1	1	1	Q9NZZ3	M10(Oxidation); T16(Phospho)	0	S(7): 1.9; Y(15): 1.9; T(16): 96.2; S(19): 0.0	1.2149e+07	0.001	0.007193	14.66	1.9185	3	2539.13	4.16379	29.3285	0
LEDYFETDSsYSDANNFIR	7	1	1	P42685	S10(Phospho)	0	Y(4): 0.0; T(7): 0.0; S(9): 33.2; S(10): 33.2; Y(11): 33.2; S(12): 0.4	1.06818e+07	0	9.98e-06	64.88	1.29222e-05	2	2365.95	-0.498055	32.1062	0
VDNEDIYEsR	1	1	1	P42685	S9(Phospho)	0	Y(7): 0.0; S(9): 100.0	4.35122e+06	0	0.002101	57.72	2.41733e-05	2	1319.52	1.03431	16.0795	0
LDEGGFFLtR	1	1	1	P42685	T9(Phospho)	0	T(9): 100.0	8.27423e+06	0	0.008102	41.84	0.00145329	2	1234.55	1.20301	31.5287	0
TAEDLsFR	1	1	1	P42685	S6(Phospho)	0	T(1): 0.0; S(6): 100.0	1.62043e+07	0.004	0.1259	38.82	0.00167305	2	1018.42	-0.461185	20.6279	0
STVIENPGALcsPQSQR	1	1	1	P42685	C11(Carbamidomethyl); S12(Phospho)	0	S(1): 1.9; T(2): 1.9; S(12): 94.3; S(15): 1.9	3.59088e+06	0.005	0.05403	17.9	0.662509	2	1923.87	1.19954	22.6739	0
LEDYFETDSSySDANNFIR	7	1	1	P42685	Y11(Phospho)	0	Y(4): 0.0; T(7): 0.0; S(9): 0.5; S(10): 49.5; Y(11): 49.5; S(12): 0.5	1.69674e+07	0	4.835e-16	70.62	3.57188e-06	2	2365.95	1.66892	32.1249	0
TGsAGLSGHHR	2	1	1	Q9UBP0	S3(Phospho)	0	T(1): 0.6; S(3): 99.4; S(7): 0.0	9.20335e+06	0	0.0002009	77.51	3.06935e-07	2	1159.5	0.703752	9.73823	0
APsYSGLSMVSGVK	1	1	1	Q9UBP0	S3(Phospho)	0	S(3): 100.0; Y(4): 0.0; S(5): 0.0; S(8): 0.0; S(11): 0.0	9.09504e+06	0	3.968e-05	61.74	2.11349e-05	2	1462.67	0.764941	28.3877	0
DPLTHTsNSLPR	2	1	1	Q9UBP0	S7(Phospho)	0	T(4): 0.0; T(6): 0.0; S(7): 50.0; S(9): 50.0	5.22542e+06	0	0.001297	39.36	0.00304758	2	1417.65	-0.372629	16.7035	0
SSGAAPAPASAsAPAPVPGGEAER	4	1	1	Q9UBP0	S12(Phospho)	0	S(1): 0.0; S(2): 0.0; S(10): 50.0; S(12): 50.0	6.47073e+06	0	0.0008344	29.38	0.058134	3	2184.99	1.15919	20.7054	0
TNKPStPTTATR	1	1	1	Q9UBP0	T6(Phospho)	0	T(1): 0.0; S(5): 0.0; T(6): 100.0; T(8): 0.0; T(9): 0.0; T(11): 0.0	2.65727e+07	0.001	0.01636	49.7	0.000318777	2	1354.64	0.898005	10.2092	0
sQTDVYNDSTNLAcR	2	1	1	Q9UBP0	S1(Phospho); C14(Carbamidomethyl)	0	S(1): 99.0; T(3): 1.0; Y(6): 0.0; S(9): 0.0; T(10): 0.0	2.81377e+06	0.001	0.02508	21.69	0.186351	2	1823.73	1.8598	20.0384	0
TNKPsTPTtATR	2	1	1	Q9UBP0	S5(Phospho); T9(Phospho)	0	T(1): 0.0; S(5): 50.0; T(6): 50.0; T(8): 1.2; T(9): 97.6; T(11): 1.2	5.93528e+06	0.003	0.08763	17.5	0.492583	2	1434.6	0.747241	10.6078	0
SVsPQTLEAYIR	2	1	1	Q9UBP0	S3(Phospho)	0	S(1): 0.0; S(3): 100.0; T(6): 0.0; Y(10): 0.0	3.934e+06	0	6.911e-09	48.89	0.000347984	2	1443.69	1.13632	31.7022	0
DPLTHTSNsLPR	1	1	1	Q9UBP0	S9(Phospho)	0	T(4): 0.0; T(6): 0.7; S(7): 49.7; S(9): 49.7	6.04349e+06	0.001	0.006948	43.43	0.00132551	2	1417.65	1.0912	16.7147	0
SSGAAPAPAsASAPAPVPGGEAER	4	1	1	Q9UBP0	S10(Phospho)	0	S(1): 0.0; S(2): 0.0; S(10): 50.0; S(12): 50.0	6.13177e+06	0	3.168e-05	20.13	0.483799	2	2184.99	-2.913	20.7373	0
tGSAGLSGHHR	1	1	1	Q9UBP0	T1(Phospho)	0	T(1): 0.7; S(3): 99.3; S(7): 0.0	1.62817e+07	0	4.311e-06	74.5	6.22697e-07	2	1159.5	0.0720828	9.34984	0
DVTEEsVTEDDKR	1	1	1	Q8TAD7	S6(Phospho)	0	T(3): 0.0; S(6): 100.0; T(8): 0.0	1.30874e+07	0	0.0007179	78.67	3.16487e-07	2	1602.65	0.597779	12.8548	1
DVTEEsVTEDDK	1	1	1	Q8TAD7	S6(Phospho)	0	T(3): 49.5; S(6): 49.5; T(8): 1.0	2.13199e+06	0.004	0.1233	21.17	0.124123	2	1446.55	-1.24697	15.8923	0
ISTAsGDGR	1	2	1	P63092	S5(Phospho)	0	S(2): 0.0; T(3): 0.0; S(5): 100.0	2.0708e+07	0.001	0.04532	36.47	0.00253602	2	943.388	-0.0680663	10.2276	0
DSTFLDEsPSESAGLKK	3	1	1	Q495M3	S8(Phospho)	0	S(2): 0.0; T(3): 0.0; S(8): 99.0; S(10): 1.0; S(12): 0.0	1.40236e+07	0	4.04e-06	74.49	1.47054e-06	2	1890.84	2.14597	23.3111	1
DSTFLDEsPSESAGLK	1	1	1	Q495M3	S8(Phospho)	0	S(2): 0.0; T(3): 0.0; S(8): 99.2; S(10): 0.8; S(12): 0.0	1.63254e+07	0	2.398e-05	62.03	1.9237e-05	2	1762.74	-0.122243	28.919	0
KLENKDsTFLDESPSESAGLK	2	1	1	Q495M3	S7(Phospho)	0	S(7): 50.0; T(8): 50.0; S(13): 0.0; S(15): 0.0; S(17): 0.0	4.91529e+06	0.003	0.09851	17.17	1.038	3	2375.1	-0.859702	24.2413	2
LDLMSPPEsAK	1	1	1	Q495M3	S9(Phospho)	0	S(5): 0.0; S(9): 100.0	8.86221e+06	0.007	0.149	30.1	0.0204731	2	1267.56	-3.40206	25.7279	0
sTEGPQGAVAIK	2	1	1	Q495M3	S1(Phospho)	0	S(1): 50.0; T(2): 50.0	1.08268e+07	0	9.525e-06	34.49	0.00748604	2	1237.58	1.06299	17.801	0
LDLmSPPEsAK	1	1	1	Q495M3	M4(Oxidation); S9(Phospho)	0	S(5): 0.0; S(9): 100.0	1.28785e+07	0.001	0.007557	30.82	0.0151513	2	1283.56	-1.39518	20.1588	0
KQsLGELIGTLNAAK	2	1	1	P60174	S3(Phospho)	0	S(3): 100.0; T(10): 0.0	1.57881e+07	0	0.0002912	69.1	2.63278e-06	2	1622.85	0.0589878	30.2224	1
DGVsLGAVsSTEEASR	1	1	1	B2RUZ4	S4(Phospho); S9(Phospho)	0	S(4): 100.0; S(9): 100.0; S(10): 0.0; T(11): 0.0; S(15): 0.0	2.98461e+07	0	7.623e-07	86.99	4.16971e-08	2	1724.68	1.13049	29.9247	0
DGVsLGAVSSTEEASR	2	1	1	B2RUZ4	S4(Phospho)	0	S(4): 100.0; S(9): 0.0; S(10): 0.0; T(11): 0.0; S(15): 0.0	1.25032e+07	0	2.786e-05	59.86	2.93304e-05	2	1644.71	-1.39862	25.3835	0
DGVSLGAVsSTEEASR	1	1	1	B2RUZ4	S9(Phospho)	0	S(4): 0.0; S(9): 99.0; S(10): 1.0; T(11): 0.0; S(15): 0.0	1.44266e+07	0	5.838e-09	106.98	5.63257e-10	2	1644.71	0.531097	23.8003	0
DmQGLsLDAASQPSK	1	1	1	Q96EY5	M2(Oxidation); S6(Phospho)	0	S(6): 100.0; S(11): 0.0; S(14): 0.0	1.35996e+07	0	7.122e-07	105.44	8.10127e-10	2	1643.7	0.199974	22.804	0
DMQGLsLDAASQPSK	1	1	1	Q96EY5	S6(Phospho)	0	S(6): 100.0; S(11): 0.0; S(14): 0.0	1.14872e+07	0	2.656e-05	91.57	1.83213e-08	2	1627.7	-1.87216	26.2372	0
APAAtVVDVDEVR	1	1	1	Q9NP85	T5(Phospho)	0	T(5): 100.0	6.30514e+06	0	6.169e-05	82.78	1.33126e-07	2	1421.67	-1.37268	23.4533	0
GSGEEGtEVVALLESERPEEGTK	3	1	1	Q9NP85	T7(Phospho)	0	S(2): 0.0; T(7): 100.0; S(15): 0.0; T(22): 0.0	1.63037e+07	0	0.002497	26.97	0.115221	3	2483.12	1.27541	29.9614	0
KKDsPML	1	1	1	Q9NP85	S4(Phospho)	0	S(4): 100.0	35506848	0.003	0.1102	28.89	0.0256953	2	898.41	0.0174635	13.2904	2
SFPAAAVLPtGAAR	1	1	1	Q86XT2	T10(Phospho)	0	S(1): 0.0; T(10): 100.0	1.05799e+07	0	0.0001872	63.12	1.28708e-05	2	1408.7	1.39473	29.5078	0
sAQPAPTSAADPPK	1	1	1	Q86XT2	S1(Phospho)	0	S(1): 100.0; T(7): 0.0; S(8): 0.0	9.99389e+07	0	0.003763	53.86	0.000102171	2	1417.64	1.50731	14.6584	0
AGPEPGsPGR	1	1	1	Q86XT2	S7(Phospho)	0	S(7): 100.0	1.38739e+08	0	0.005634	47.49	0.000186259	2	1004.42	0.206262	11.1988	0
ERsAQPAPTSAADPPK	2	1	1	Q86XT2	S3(Phospho)	0	S(3): 100.0; T(9): 0.0; S(10): 0.0	3.28879e+07	0	6.205e-05	41.77	0.00229519	3	1702.78	-0.283855	12.1973	1
FGILsTGQLR	1	1	1	Q86XT2	S5(Phospho)	0	S(5): 99.1; T(6): 0.9	4.65988e+06	0.002	0.06554	38.26	0.00265717	2	1171.59	3.79657	31.8487	0
DSGsISLQETR	1	1	1	Q9H2G2	S4(Phospho)	0	S(2): 0.9; S(4): 99.1; S(6): 0.0; T(10): 0.0	3.16215e+06	0.001	0.02519	51.79	0.00012847	2	1272.55	-0.960653	18.8876	0
KPGMsSTAR	2	1	1	Q96CF2	S5(Phospho)	0	S(5): 98.4; S(6): 0.8; T(7): 0.8	1.22345e+07	0	0.002411	62.74	7.90181e-06	2	1014.44	0.874811	9.78259	0
LPNVPSSsLPAQPNR	1	1	1	Q96CF2	S8(Phospho)	0	S(6): 0.0; S(7): 1.1; S(8): 98.9	1.96701e+07	0	0.004204	47.47	0.000552402	2	1656.81	1.11251	23.7845	0
KPGMSStAR	1	1	1	Q96CF2	T7(Phospho)	0	S(5): 0.0; S(6): 0.0; T(7): 100.0	1.21136e+07	0.006	0.04931	58.26	2.14962e-05	2	1014.44	0.152818	9.21727	0
LPNVPSsSLPAQPNR	2	1	1	Q96CF2	S7(Phospho)	0	S(6): 0.6; S(7): 49.7; S(8): 49.7	1.81527e+07	0	0.00267	23.45	0.137138	2	1656.81	-1.31886	23.8492	0
NRPtSISWDGLDSGK	2	1	1	P30086	T4(Phospho)	0	T(4): 49.7; S(5): 49.7; S(7): 0.6; S(13): 0.0	1.00419e+07	0.002	0.05347	25.39	0.105365	2	1712.77	3.23835	25.178	0
NRPTsISWDGLDSGK	2	1	1	P30086	S5(Phospho)	0	T(4): 50.0; S(5): 50.0; S(7): 0.0; S(13): 0.0	1.17496e+07	0.001	0.00819	21.49	0.247288	2	1712.77	1.38531	25.1154	0
sPDEVTLTSIVPTR	1	1	1	Q9UKS6	S1(Phospho)	0	S(1): 100.0; T(6): 0.0; T(8): 0.0; S(9): 0.0; T(13): 0.0	4.19486e+06	0	0.0001805	65.93	7.40283e-06	2	1594.77	0.0289924	32.1658	0
DGTAPPPQSPGSPGTGQDEEWsDEESPR	1	1	1	Q9UKS6	S22(Phospho)	0	T(3): 2.8; S(9): 0.1; S(12): 0.0; T(15): 0.0; S(22): 97.1; S(26): 0.1	1.04323e+07	0.002	0.06535	21.27	0.418011	3	2990.2	1.04695	23.2537	0
ALYDYAGQEADELsFR	1	1	1	Q9UKS6	S14(Phospho)	0	Y(3): 0.0; Y(5): 0.0; S(14): 100.0	3.04654e+06	0.003	0.02671	30.34	0.0334278	2	1927.81	-0.480394	31.322	0
SPDEVtLTSIVPTR	3	1	1	Q9UKS6	T6(Phospho)	0	S(1): 0.0; T(6): 33.2; T(8): 33.2; S(9): 33.2; T(13): 0.4	1.00148e+06	0.001	0.01153	11.51	2.09776	2	1594.77	-0.58336	31.2223	0
SDGsLEDGDDVHR	1	1	1	Q9NRX5	S4(Phospho)	0	S(1): 0.0; S(4): 100.0	2.80519e+07	0	0.002382	71.45	9.30986e-07	2	1481.56	1.99934	11.925	0
TYNTNAQVPDsAGTATAYLcGVK	1	1	1	P05186	S11(Phospho); C20(Carbamidomethyl)	0	T(1): 0.0; Y(2): 0.0; T(4): 0.0; S(11): 98.6; T(14): 1.4; T(16): 0.0; Y(18): 0.0	9.95146e+06	0	1.006e-05	65.7	1.52341e-05	3	2482.1	-0.221335	28.5615	0
AVSDsFGPGEWDDR	2	1	1	Q969X1	S5(Phospho)	0	S(3): 1.0; S(5): 99.0	4.68356e+07	0	0.0004115	58.72	2.53783e-05	2	1617.62	1.33323	26.8219	0
AVSDsFGPGEWDDRK	6	1	1	Q969X1	S5(Phospho)	0	S(3): 50.0; S(5): 50.0	6.14024e+06	0.002	0.06362	27.32	0.0551426	3	1745.72	0.598774	23.1102	1
AVsDSFGPGEWDDR	2	1	1	Q969X1	S3(Phospho)	0	S(3): 100.0; S(5): 0.0	5.89398e+07	0	4.952e-16	92.33	1.03215e-08	2	1617.63	2.08786	27.695	0
AVsDSFGPGEWDDRK	6	1	1	Q969X1	S3(Phospho)	0	S(3): 100.0; S(5): 0.0	1.39378e+07	0	0.002063	42.29	0.00188864	2	1745.72	3.75311	23.7835	1
GHETTGHTyER	2	1	1	Q96A22	Y9(Phospho)	0	T(4): 0.0; T(5): 0.0; T(8): 0.0; Y(9): 100.0	7.40903e+06	0	0.0002364	54.41	5.03518e-05	2	1367.54	-1.04706	9.23867	0
HVHLENATEYAtLR	3	1	1	Q96A22	T12(Phospho)	0	T(8): 0.0; Y(10): 0.0; T(12): 100.0	3.2717e+07	0	1.998e-05	51.68	0.000252324	3	1733.8	-0.087114	24.0112	0
VLQQQGsQER	1	1	1	Q96A22	S7(Phospho)	0	S(7): 100.0	1.60035e+07	0.001	0.01664	44.09	0.000756487	2	1252.57	0.260859	10.8817	0
tLKPQPQQLQQNLPK	1	1	1	Q96A22	T1(Phospho)	0	T(1): 100.0	4.86303e+06	0.009	0.1429	19.02	0.236217	3	1840.98	4.99016	21.7647	0
SDSELNsEVAAR	1	1	1	Q53TN4	S7(Phospho)	0	S(1): 0.0; S(3): 0.0; S(7): 100.0	8.21663e+06	0	0.0004124	59.99	1.86429e-05	2	1357.56	-3.53214	16.392	0
sLNLQAESVR	1	1	1	Q12923	S1(Phospho)	0	S(1): 100.0; S(8): 0.0	4198412	0	0.005486	47.9	0.000418427	2	1196.57	0.546833	22.1256	0
GsPNLTLPK	1	1	1	Q12923	S2(Phospho)	0	S(2): 100.0; T(6): 0.0	0	0.009	0.178	41.73	0.000983643	2	1006.5	1.09403	21.8368	0
cDSSPDsAEDVR	1	1	1	P02765	C1(Carbamidomethyl); S7(Phospho)	0	S(3): 0.0; S(4): 0.0; S(7): 100.0	2.40027e+07	0	0.000957	78.84	1.1429e-07	2	1417.5	0.879309	12.5993	0
cDSSPDsAEDVRK	1	1	1	P02765	C1(Carbamidomethyl); S7(Phospho)	0	S(3): 0.0; S(4): 0.0; S(7): 100.0	2.6564e+07	0	1.309e-05	78.82	1.90925e-07	2	1545.59	1.28077	10.7566	1
FSVVYAKcDSSPDsAEDVRK	3	1	1	P02765	C8(Carbamidomethyl); S14(Phospho)	0	S(2): 0.0; Y(5): 0.0; S(10): 0.0; S(11): 0.0; S(14): 100.0	2.33862e+08	0	4.185e-07	82.23	2.20215e-07	3	2340.02	0.909146	34.9532	2
HTFmGVVSLGSPsGEVSHPR	1	1	1	P02765	M4(Oxidation); S13(Phospho)	0	T(2): 0.0; S(8): 0.0; S(11): 0.0; S(13): 100.0; S(17): 0.0	105333327	0	4.258e-08	65.9	8.64938e-06	3	2176.98	0.0119399	40.8968	0
FSVVYAKcDSSPDsAEDVR	2	1	1	P02765	C8(Carbamidomethyl); S14(Phospho)	0	S(2): 0.0; Y(5): 0.0; S(10): 0.0; S(11): 0.0; S(14): 100.0	1.18819e+07	0	1.326e-05	65.75	7.42342e-06	3	2211.93	-0.00429984	42.0994	1
ISsTSVKPKPPPVR	3	1	1	Q9Y6W3	S3(Phospho)	0	S(2): 0.4; S(3): 33.2; T(4): 33.2; S(5): 33.2	1.83072e+07	0.003	0.1103	12.35	1.0245	3	1572.85	0.500656	18.838	0
ISSTsVKPKPPPVR	1	1	1	Q9Y6W3	S5(Phospho)	0	S(2): 1.1; S(3): 48.9; T(4): 1.1; S(5): 48.9	1.30021e+07	0.008	0.09446	13.74	0.74601	3	1572.85	-0.779923	17.8812	0
KQGAEsVLQnGLR	2	1	1	Q1EHB4	S6(Phospho); N10(Deamidated)	0	S(6): 100.0	1.15116e+07	0	0.0005166	74.54	1.00546e-06	2	1480.72	-0.408506	22.3574	1
QGAEsVLQnGLR	2	1	1	Q1EHB4	S5(Phospho); N9(Deamidated)	0	S(5): 100.0	5.95594e+06	0	0.0005499	52.98	0.000130658	2	1352.62	1.44748	26.5053	0
REsLVHVPGYDPK	2	1	1	Q1EHB4	S3(Phospho)	0	S(3): 100.0; Y(10): 0.0	3.15256e+08	0	0.001166	11.79	2.09923	3	1576.75	0.30649	24.1443	1
EsLVHVPGYDPK	1	1	1	Q1EHB4	S2(Phospho)	0	S(2): 100.0; Y(9): 0.0	1.36217e+07	0.001	0.0301	26.23	0.0656329	2	1420.65	0.467783	24.8176	0
NLTSSsLNDISDKPEKDQLK	1	1	1	Q9Y6R1	S6(Phospho)	0	T(3): 33.0; S(4): 33.0; S(5): 0.4; S(6): 33.0; S(11): 0.4	2.54023e+07	0	0.008357	31.52	0.0340719	3	2312.1	0.245581	21.492	1
NLTSsSLNDISDKPEK	3	1	1	Q9Y6R1	S5(Phospho)	0	T(3): 0.4; S(4): 33.2; S(5): 33.2; S(6): 33.2; S(11): 0.0	2.92582e+07	0	0.002927	29.27	0.0446598	3	1827.84	-0.466892	17.5879	0
MFTNPDnGsPAmTHR	2	1	1	Q9Y6R1	N7(Deamidated); S9(Phospho); M12(Oxidation)	0	T(3): 0.0; S(9): 100.0; T(13): 0.0	3.6497e+07	0	0.0101	26.65	0.0411998	3	1772.68	0.878114	15.3191	0
GSLDsDNDDSDcPYSEK	1	1	1	Q9Y6R1	S5(Phospho); C12(Carbamidomethyl)	0	S(2): 49.6; S(5): 49.6; S(10): 0.8; Y(14): 0.0; S(15): 0.0	2.16822e+06	0.001	0.02447	25.91	0.0287222	2	1983.68	1.98475	16.7001	0
MFTnPDNGsPAMTHR	2	1	1	Q9Y6R1	N4(Deamidated); S9(Phospho)	0	T(3): 1.6; S(9): 98.4; T(13): 0.0	3.6051e+06	0.001	0.02095	18.38	0.358672	3	1756.68	-0.514535	18.282	0
KGsLDSDNDDSDcPYSEK	2	1	1	Q9Y6R1	S3(Phospho); C13(Carbamidomethyl)	0	S(3): 49.7; S(6): 49.7; S(11): 0.6; Y(15): 0.0; S(16): 0.0	1.872e+06	0.001	0.02476	13.88	0.894235	2	2111.78	2.26933	13.1942	1
ERsPTFLER	2	1	1	Q9Y6R1	S3(Phospho)	0	S(3): 100.0; T(5): 0.0	6.86635e+07	0.006	0.1424	22.92	0.104654	2	1214.56	-0.0132942	18.0503	1
mFTNPDnGsPAmTHR	1	1	1	Q9Y6R1	M1(Oxidation); N7(Deamidated); S9(Phospho); M12(Oxidation)	0	T(3): 0.0; S(9): 99.9; T(13): 0.0	1.68796e+07	0	2.318e-05	17.33	0.372628	2	1788.67	0.205985	13.1505	0
MFTNPDnGsPAMTHR	1	1	1	Q9Y6R1	N7(Deamidated); S9(Phospho)	0	T(3): 0.0; S(9): 100.0; T(13): 0.0	1.23016e+07	0	3.86e-12	45.35	0.000767283	3	1756.69	3.3421	17.5439	0
tPPAsPLHTHI	1	1	1	Q9HCH3	T1(Phospho); S5(Phospho)	0	T(1): 100.0; S(5): 100.0; T(9): 0.0	9.75747e+06	0	0.01145	52.88	9.45445e-05	2	1330.56	1.62763	22.6603	0
tPPASPLHTHI	1	1	1	Q9HCH3	T1(Phospho)	0	T(1): 100.0; S(5): 0.0; T(9): 0.0	1.2233e+07	0	0.00643	48.97	0.00028332	2	1250.59	1.06636	22.0504	0
FRGsQEDLEAR	1	1	1	Q9NRR6	S4(Phospho)	0	S(4): 100.0	1.61624e+07	0	3.106e-05	74.93	7.63244e-07	2	1387.6	2.21013	13.4728	1
sSFSLLAPIR	2	1	1	Q9NRR6	S1(Phospho)	0	S(1): 50.0; S(2): 50.0; S(4): 0.0	4.00129e+06	0	0.01052	39.26	0.00184387	2	1170.59	0.0548817	34.7142	0
SPLAcDDcsLR	1	1	1	Q9NRR6	C5(Carbamidomethyl); C8(Carbamidomethyl); S9(Phospho)	0	S(1): 0.0; S(9): 100.0	5.24372e+06	0.001	0.02047	53.08	6.1997e-05	2	1373.52	-1.57039	17.9202	0
SPsPPDGsPAATPEIR	2	1	1	O00499	S3(Phospho); S8(Phospho)	0	S(1): 1.0; S(3): 99.0; S(8): 100.0; T(12): 0.0	1.86913e+07	0	0.001834	79.33	3.01037e-07	2	1738.71	-0.297858	25.5702	0
SPsPPDGSPAATPEIR	2	1	1	O00499	S3(Phospho)	0	S(1): 1.0; S(3): 99.0; S(8): 0.0; T(12): 0.0	8.07564e+07	0	7.85e-05	63.96	1.33194e-05	2	1658.74	0.437211	21.423	0
sPSPPDGSPAATPEIR	2	1	1	O00499	S1(Phospho)	0	S(1): 1.0; S(3): 99.0; S(8): 0.0; T(12): 0.0	8.94564e+07	0	9.531e-16	86.61	7.55225e-08	2	1658.75	1.90905	21.4365	0
VSEVyPEKEELK	1	1	1	P22732	Y5(Phospho)	0	S(2): 0.0; Y(5): 100.0	2.74898e+06	0	0.003568	31.14	0.0230739	2	1529.71	0.562698	15.1917	1
SGsYSLPR	1	1	1	Q9BW04	S3(Phospho)	0	S(1): 0.0; S(3): 99.2; Y(4): 0.8; S(5): 0.0	1.18843e+07	0.004	0.1234	33.49	0.00575312	2	946.403	0.504734	17.4122	0
RLsYQGQSR	1	1	1	Q9BW04	S3(Phospho)	0	S(3): 100.0; Y(4): 0.0; S(8): 0.0	9.32204e+06	0.001	0.0117	40.61	0.00184654	2	1174.54	5.86633	11.1333	1
SGSYsLPR	1	1	1	Q9BW04	S5(Phospho)	0	S(1): 0.0; S(3): 98.1; Y(4): 0.9; S(5): 0.9	1.69924e+07	0.006	0.04571	57.71	2.16875e-05	2	946.403	-0.0756917	17.5517	0
QPSGAEsGTLAR	1	1	1	Q9NQA5	S7(Phospho)	0	S(3): 0.0; S(7): 100.0; T(9): 0.0	1.21267e+07	0	0.002193	73.52	9.13717e-07	2	1253.55	0.730631	12.86	0
AsLALPTsSLSR	3	1	1	Q9NQA5	S2(Phospho); S8(Phospho)	0	S(2): 100.0; T(7): 0.3; S(8): 33.2; S(9): 33.2; S(11): 33.2	1.03413e+07	0	0.01047	38.41	0.00360529	2	1362.61	0.516732	32.6938	0
ASLALPTSsLSR	2	1	1	Q9NQA5	S9(Phospho)	0	S(2): 0.0; T(7): 0.0; S(8): 33.3; S(9): 33.3; S(11): 33.3	2.00434e+07	0.001	0.01694	53.16	0.000119799	2	1282.64	0.566417	26.9125	0
sWANHENK	1	1	1	Q8IX04	S1(Phospho)	0	S(1): 100.0	5.04408e+06	0	0.009498	40.54	0.000803603	2	1065.41	-1.27695	10.0414	0
LFDDEAsVDEPR	1	1	1	Q8NI35	S7(Phospho)	0	S(7): 100.0	9.61509e+06	0	2.695e-06	90.53	1.61091e-08	2	1472.6	0.906076	23.9114	0
ALtDDSDENEEEDAFTDQK	2	1	1	Q8NI35	T3(Phospho)	0	T(3): 50.0; S(6): 50.0; T(16): 0.0	5.71861e+06	0	0.003088	34.43	0.00814908	2	2251.85	3.78088	23.1119	0
RDsIEMSMK	1	1	1	Q07837	S3(Phospho)	0	S(3): 100.0; S(7): 0.0	5.3136e+06	0.001	0.02414	50.6	0.000137612	2	1176.47	-4.16131	15.4816	1
RDsIEMSmK	1	1	1	Q07837	S3(Phospho); M8(Oxidation)	0	S(3): 100.0; S(7): 0.0	0	0.002	0.0732	31.45	0.0114583	2	1192.47	0.261131	11.7406	1
RDsIEmSmK	1	1	1	Q07837	S3(Phospho); M6(Oxidation); M8(Oxidation)	0	S(3): 100.0; S(7): 0.0	7.04532e+06	0.008	0.1122	26.92	0.0267255	2	1208.47	0.525996	9.55277	1
cLVAAGAWGAGDscR	1	1	1	Q99835	C1(Carbamidomethyl); S13(Phospho); C14(Carbamidomethyl)	0	S(13): 100.0	1.60384e+07	0	0.000245	76.76	4.58627e-07	2	1630.65	-1.84951	26.4319	0
EVcPLAPPPELHPPAPAPsTIPR	4	1	1	Q99835	C3(Carbamidomethyl); S19(Phospho)	0	S(19): 50.0; T(20): 50.0	1.43296e+07	0.001	0.04466	13.63	1.72537	3	2523.25	1.27842	30.6846	0
EVcPLAPPPELHPPAPAPstIPR	1	1	1	Q99835	C3(Carbamidomethyl); S19(Phospho); T20(Phospho)	0	S(19): 100.0; T(20): 100.0	1.02853e+07	0.002	0.07011	11.23	4.27153	3	2603.22	1.39467	33.1571	0
DEDDEAyGKPVK	1	1	1	Q53GD3	Y7(Phospho)	0	Y(7): 100.0	4.55288e+06	0	3.05e-06	72.35	1.15547e-06	2	1445.59	1.37687	11.0999	0
QLQAsPGLGAGATR	1	1	1	Q92630	S5(Phospho)	0	S(5): 100.0; T(13): 0.0	1.03211e+07	0	1.876e-05	69.02	3.66544e-06	2	1406.68	1.24214	18.618	0
KPsAAAPAAYPTGR	1	1	1	Q92630	S3(Phospho)	0	S(3): 100.0; Y(10): 0.0; T(12): 0.0	1.08996e+07	0	0.0002806	56.79	5.96822e-05	2	1437.69	0.491312	13.691	0
SGVGTGPPsPIALPPLR	1	1	1	Q92630	S9(Phospho)	0	S(1): 0.0; T(5): 0.0; S(9): 100.0	1.59236e+07	0.001	0.03915	26.75	0.0399449	2	1695.89	1.76405	33.4562	0
LPKPPtGEK	1	1	1	Q92630	T6(Phospho)	0	T(6): 100.0	3.27946e+06	0.003	0.09205	28.29	0.0323189	2	1046.53	1.51974	12.5649	0
LPPPSsSASK	2	1	1	Q92630	S6(Phospho)	0	S(5): 0.6; S(6): 49.4; S(7): 49.4; S(9): 0.6	3.04304e+07	0.003	0.1021	22.94	0.0711423	2	1050.49	2.07227	11.6428	0
VYTyIQSR	2	2	1	Q92630	Y4(Phospho)	0	Y(2): 0.0; T(3): 0.8; Y(4): 99.2; S(7): 0.0	3.34522e+07	0.001	0.005335	41.34	0.00104668	2	1109.5	-0.0912343	16.0529	0
ITEsTGAITSISK	2	1	1	Q92630	S4(Phospho)	0	T(2): 0.0; S(4): 50.0; T(5): 50.0; T(9): 0.0; S(10): 0.0; S(12): 0.0	5.07934e+06	0.001	0.005335	38.33	0.00376045	2	1387.67	-0.08353	22.105	0
sGVGTGPPSPIALPPLR	3	1	1	Q92630	S1(Phospho)	0	S(1): 98.8; T(5): 1.2; S(9): 0.0	1.38956e+07	0.002	0.01088	20.16	0.208187	2	1695.88	-0.251398	33.632	0
NKEPsEVDDAEDK	1	1	1	Q9HBJ8	S5(Phospho)	0	S(5): 100.0	2.51379e+07	0	9.676e-05	64.07	8.18741e-06	2	1555.62	1.24402	11.3204	1
SLGASESSYTsVNR	2	1	1	O75631	S11(Phospho)	0	S(1): 0.0; S(5): 0.0; S(7): 0.0; S(8): 0.0; Y(9): 0.0; T(10): 0.0; S(11): 100.0	5.78872e+06	0	1.555e-05	91.71	1.68632e-08	2	1537.65	-0.271069	16.5284	0
STVGSSDNSsPQPLK	1	1	1	Q9UHG0	S10(Phospho)	0	S(1): 0.0; T(2): 0.0; S(5): 0.0; S(6): 0.0; S(9): 0.0; S(10): 100.0	1.07439e+07	0	3.038e-06	70.83	2.47811e-06	2	1583.7	1.19508	15.2492	0
STVGSsDNSSPQPLKR	4	1	1	Q9UHG0	S6(Phospho)	0	S(1): 49.6; T(2): 49.6; S(5): 0.7; S(6): 0.0; S(9): 0.0; S(10): 0.0	5.41463e+06	0.001	0.04014	21.3	0.272802	2	1739.8	1.27203	12.3009	1
STVGSSDNsSPQPLKR	2	1	1	Q9UHG0	S9(Phospho)	0	S(1): 48.0; T(2): 48.0; S(5): 1.0; S(6): 1.0; S(9): 1.0; S(10): 1.0	6.24861e+06	0.009	0.153	19.31	0.431368	2	1739.8	1.41235	12.3003	1
SKPPYtDyVSTR	2	1	1	Q9UPZ9	T6(Phospho); Y8(Phospho)	0	S(1): 0.0; Y(5): 0.9; T(6): 99.1; Y(8): 100.0; S(10): 0.0; T(11): 0.0	3.67547e+07	0	0.0001135	63.08	1.18582e-05	2	1573.63	0.871863	16.5918	0
EIGsAMQR	1	1	1	Q9UPZ9	S4(Phospho)	0	S(4): 100.0	2.4532e+06	0.002	0.01523	29.05	0.0131919	2	971.402	0.562016	15.3824	0
SKPPYtDYVSTR	1	1	1	Q9UPZ9	T6(Phospho)	0	S(1): 0.0; Y(5): 50.0; T(6): 50.0; Y(8): 0.0; S(10): 0.0; T(11): 0.0	9.14983e+06	0.007	0.06753	18.92	0.366105	2	1493.67	0.524915	17.0883	0
SGENPYAsIDISK	2	1	1	Q9BYF1	S8(Phospho)	0	S(1): 0.0; Y(6): 0.0; S(8): 100.0; S(12): 0.0	7.33301e+06	0	0.004125	46.42	0.000571226	2	1460.63	-0.412075	23.9978	0
EsPPPSYTSSMR	1	1	1	Q9C0H2	S2(Phospho)	0	S(2): 100.0; S(6): 0.0; Y(7): 0.0; T(8): 0.0; S(9): 0.0; S(10): 0.0	6.14577e+06	0.002	0.0615	16.82	0.34211	2	1418.57	0.703358	16.7843	0
EsPPPSYTSSmR	1	1	1	Q9C0H2	S2(Phospho); M11(Oxidation)	0	S(2): 100.0; S(6): 0.0; Y(7): 0.0; T(8): 0.0; S(9): 0.0; S(10): 0.0	6.37053e+06	0.007	0.1657	21.42	0.11718	2	1434.56	1.60229	13.6533	0
DSSPSSSPsPK	1	1	1	Q6WKZ4	S9(Phospho)	0	S(2): 0.0; S(3): 0.0; S(5): 0.0; S(6): 0.0; S(7): 0.0; S(9): 100.0	2.16971e+06	0	0.01385	32.96	0.00660101	2	1155.46	-0.943667	10.5143	0
SLsSPTVTLSAPLEGAK	3	1	1	Q96PU5	S3(Phospho)	0	S(1): 0.9; S(3): 98.2; S(4): 0.9; T(6): 0.0; T(8): 0.0; S(10): 0.0	8.24365e+06	0	0.00044	50.51	0.000265427	2	1737.87	1.20028	30.9205	0
tSPQELSEELSR	2	1	1	Q96PU5	T1(Phospho)	0	T(1): 50.0; S(2): 50.0; S(7): 0.0; S(11): 0.0	4.46346e+06	0	0.01397	28.02	0.0399136	2	1455.63	-1.81207	23.8962	0
ScsVTDAVAEQGHLPPPSAPAGR	1	1	1	Q96PU5	C2(Carbamidomethyl); S3(Phospho)	0	S(1): 2.2; S(3): 97.8; T(5): 0.1; S(18): 0.0	5.60148e+06	0.002	0.05289	16.75	1.10853	3	2384.08	2.45656	22.5903	0
LADFGVAGQLTDtQIK	3	3	1	Q9Y6E0	T13(Phospho)	0	T(11): 0.0; T(13): 100.0	5.06541e+07	0	0.001899	32.68	0.0183434	2	1756.86	4.62107	30.6268	0
LADFGVAGQLTDtQIKR	1	3	1	Q9Y6E0	T13(Phospho)	0	T(11): 0.0; T(13): 100.0	1.08041e+07	0.001	0.03136	36.69	0.00713583	3	1912.95	0.32048	26.6188	1
RRsPESLPAGPGAAALEGGTR	1	1	1	Q717R9	S3(Phospho)	0	S(3): 98.8; S(6): 1.2; T(20): 0.0	4.45785e+06	0	0.0002241	51.64	0.000264598	3	2130.05	0.907035	24.0503	2
VPVAAAEVPGAAAEEAPGRDPsPVAPPDGR	2	1	1	Q717R9	S22(Phospho)	0	S(22): 100.0	6.26602e+07	0	6.952e-06	40.37	0.00540898	4	2930.41	1.61758	24.8905	1
DPsPVAPPDGR	1	1	1	Q717R9	S3(Phospho)	0	S(3): 100.0	4.21576e+06	0	0.001494	36.42	0.00375116	2	1187.51	-1.01731	16.9646	0
sPESLPAGPGAAALEGGTR	4	1	1	Q717R9	S1(Phospho)	0	S(1): 100.0; S(4): 0.0; T(18): 0.0	3.17186e+07	0	0.002198	31.96	0.0254081	2	1817.84	-0.323171	26.4679	0
RVPVAAAEVPGAAAEEAPGRDPsPVAPPDGR	1	1	1	Q717R9	S23(Phospho)	0	S(23): 100.0	2.7365e+07	0	0.0001497	13.67	2.0403	3	3086.51	1.50552	24.569	2
LRPTAVAGSAVcAEQSTEGHPGSGNVSEAPGsGR	1	1	1	Q717R9	C12(Carbamidomethyl); S32(Phospho)	0	T(4): 0.0; S(9): 0.0; S(16): 0.0; T(17): 0.0; S(23): 0.0; S(27): 0.0; S(32): 100.0	1.98921e+07	0	9.041e-10	46.52	0.00177718	4	3373.52	0.431714	21.4604	0
SAsADNLTLPR	1	1	1	Q8ND76	S3(Phospho)	0	S(1): 0.0; S(3): 100.0; T(8): 0.0	8.70408e+07	0	0.005191	76.33	5.34297e-07	2	1224.56	0.795043	22.5407	0
SAsADnLTLPR	1	1	1	Q8ND76	S3(Phospho); N6(Deamidated)	0	S(1): 1.0; S(3): 99.0; T(8): 0.0	1.54194e+07	0	0.002625	46.51	0.000453415	2	1225.55	2.38219	24.0796	0
SAsADNLtLPR	1	1	1	Q8ND76	S3(Phospho); T8(Phospho)	0	S(1): 1.7; S(3): 98.3; T(8): 100.0	1.89557e+06	0.007	0.07591	28.34	0.0219832	2	1304.53	-0.768057	28.6947	0
VRPTLADLHsFLK	1	1	1	P55017	S10(Phospho)	0	T(4): 0.0; S(10): 100.0	1.08726e+07	0	0.000523	42.3	0.00133079	3	1576.82	0.135097	30.5672	0
TFGYNtIDVVPTYEHYANSTQPGEPR	1	1	1	P55017	T6(Phospho)	0	T(1): 0.0; Y(4): 2.1; T(6): 91.6; T(12): 2.1; Y(13): 2.1; Y(16): 2.1; S(19): 0.1; T(20): 0.0	1.79327e+07	0.009	0.1828	12.97	3.71935	3	3036.35	3.52381	29.8396	0
tFGYNTIDVVPTYEHYANsTQPGEPR	4	1	1	P55017	T1(Phospho); S19(Phospho)	0	T(1): 97.6; Y(4): 4.4; T(6): 2.2; T(12): 2.1; Y(13): 2.1; Y(16): 2.1; S(19): 87.4; T(20): 2.1	1.05909e+07	0.001	0.007794	19.07	0.815128	3	3116.31	-0.0208791	33.0223	0
TFGYNTIDVVPTYEHYANsTQPGEPR	2	1	1	P55017	S19(Phospho)	0	T(1): 0.0; Y(4): 0.0; T(6): 0.0; T(12): 0.0; Y(13): 0.0; Y(16): 0.0; S(19): 50.0; T(20): 50.0	1.70981e+07	0.002	0.01852	21.51	0.518084	3	3036.35	3.4032	29.9763	0
IAsAPEPR	1	1	1	Q6P1N0	S3(Phospho)	0	S(3): 100.0	2.26783e+07	0.001	0.01896	34.79	0.00461333	2	920.424	-0.152883	14.1161	0
KQNsPVAPTAQPK	1	1	1	Q6P1N0	S4(Phospho)	0	S(4): 100.0; T(9): 0.0	5.53585e+06	0.001	0.022	19.11	0.373755	2	1445.72	0.935054	11.2244	1
SARPLHsLSVLAFDQER	3	1	1	Q6P1N0	S7(Phospho)	0	S(1): 0.0; S(7): 50.0; S(9): 50.0	1.89634e+06	0	0.0002458	18.35	0.472283	3	2005.99	0.257149	29.5231	0
GPASTPtYSPAPTQPAPR	2	1	1	Q6P1N0	T7(Phospho)	0	S(4): 24.9; T(5): 0.4; T(7): 24.9; Y(8): 24.9; S(9): 24.9; T(13): 0.0	4.29136e+06	0	0.001878	21.9	0.275694	2	1875.86	-1.19652	18.663	0
tASGSSVTSLDGTR	2	1	1	Q92597	T1(Phospho)	0	T(1): 100.0; S(3): 0.0; S(5): 0.0; S(6): 0.0; T(8): 0.0; S(9): 0.0; T(13): 0.0	1.46134e+07	0	3.087e-05	84.36	9.19758e-08	2	1418.62	4.26015	16.8785	0
TASGssVTSLDGTR	1	1	1	Q92597	S5(Phospho); S6(Phospho)	0	T(1): 1.6; S(3): 96.8; S(5): 3.2; S(6): 98.4; T(8): 0.0; S(9): 0.0; T(13): 0.0	2.28294e+06	0	1.023e-05	43.46	0.000748356	2	1498.58	1.16688	22.6489	0
TAsGSSVTSLDGTR	1	1	1	Q92597	S3(Phospho)	0	T(1): 0.0; S(3): 100.0; S(5): 0.0; S(6): 0.0; T(8): 0.0; S(9): 0.0; T(13): 0.0	1.55596e+07	0	3.007e-12	80.18	2.34573e-07	2	1418.61	-1.41906	17.0395	0
VADAKGDsESEEDEDLEVPVPSR	2	1	1	P13861	S8(Phospho)	0	S(8): 50.0; S(10): 50.0; S(22): 0.0	6259491	0	0.00671	30.66	0.0421776	3	2553.09	1.12727	23.9909	1
GDsEsEEDEDLEVPVPSR	1	1	1	P13861	S3(Phospho); S5(Phospho)	0	S(3): 100.0; S(5): 100.0; S(17): 0.0	1.28423e+07	0.001	0.02138	38.66	0.00262078	2	2148.79	-1.08262	33.4838	0
VADAKGDsEsEEDEDLEVPVPSR	1	1	1	P13861	S8(Phospho); S10(Phospho)	0	S(8): 99.9; S(10): 99.9; S(22): 0.2	5.94706e+06	0.003	0.08438	21.39	0.30678	3	2633.06	2.91577	27.004	1
SnGHAStDQLSEEK	4	1	1	P51159	N2(Deamidated); T7(Phospho)	0	S(1): 0.0; S(6): 50.0; T(7): 50.0; S(11): 0.0	7.8386e+06	0	0.001211	40.39	0.00174596	2	1583.63	3.21197	11.2573	0
SnGHAsTDQLSEEK	3	1	1	P51159	N2(Deamidated); S6(Phospho)	0	S(1): 0.0; S(6): 98.7; T(7): 1.3; S(11): 0.0	9.03832e+06	0	1.037e-06	68.16	2.826e-06	2	1583.62	0.899491	11.2043	0
EsPEGSYTDDANQEVR	1	1	1	Q5T0N5	S2(Phospho)	0	S(2): 100.0; S(6): 0.0; Y(7): 0.0; T(8): 0.0	1.04672e+07	0	2.345e-06	88.96	2.8842e-08	2	1876.72	-1.70613	16.5615	0
RHsSDINHLVTQGR	2	1	1	Q5T0N5	S3(Phospho)	0	S(3): 50.0; S(4): 50.0; T(11): 0.0	5.83159e+06	0.001	0.04989	25.46	0.101405	4	1699.8	0.10043	22.9183	1
TIsDGTISASK	1	1	1	Q5T0N5	S3(Phospho)	0	T(1): 0.0; S(3): 98.7; T(6): 1.2; S(8): 0.0; S(10): 0.0	3.9981e+06	0.001	0.0344	19.03	0.251302	2	1159.52	0.373862	16.4962	0
IDsTEVIYQPR	1	1	1	Q15831	S3(Phospho)	0	S(3): 100.0; T(4): 0.0; Y(8): 0.0	1.23341e+08	0	1.966e-05	87.56	5.0161e-08	2	1400.65	0.448081	23.701	0
KQELDLNsSMR	2	1	1	Q8N3R9	S8(Phospho)	0	S(8): 50.0; S(9): 50.0	6.2623e+06	0.008	0.1747	22.02	0.140685	2	1400.62	-2.05691	17.7636	1
LIEDNEyTAR	1	4	1	P12931	Y7(Phospho)	0	Y(7): 99.3; T(8): 0.7	1.10231e+07	0	0.000673	75.03	6.59507e-07	2	1303.56	1.44756	15.3038	0
sLEPAENVHGAGGGAFPASQTPSKPASADGHR	1	1	1	P12931	S1(Phospho)	0	S(1): 100.0; S(19): 0.0; T(21): 0.0; S(23): 0.0; S(27): 0.0	2.50445e+07	0.001	0.02268	20.69	0.64793	4	3180.45	0.691924	22.2998	0
SGYHDDsDEDLLE	1	1	1	Q99523	S7(Phospho)	0	S(1): 0.0; Y(3): 0.0; S(7): 100.0	4.3394e+06	0.001	0.03607	34.64	0.00383067	2	1574.55	-0.649549	23.8743	0
RLsASPSQIEVSALSSDPQR	3	1	1	Q6ZQN7	S3(Phospho)	0	S(3): 98.9; S(5): 1.1; S(7): 0.0; S(12): 0.0; S(15): 0.0; S(16): 0.0	1.17014e+07	0	1.18e-05	71.13	3.1607e-06	3	2208.06	-0.831214	25.6577	1
GIENLAFVPSsPDILR	4	1	1	Q6ZQN7	S11(Phospho)	0	S(10): 50.0; S(11): 50.0	3.75956e+07	0	0.003433	31.02	0.0247482	2	1807.9	2.37049	38.0682	0
SLsLSEFEEGSYGWR	2	1	1	Q6ZQN7	S3(Phospho)	0.0345	S(1): 1.1; S(3): 98.9; S(5): 0.0; S(11): 0.0; Y(12): 0.0	1.47074e+07	0	0.00813	27.76	0.0550219	2	1826.76	0.668759	34.9725	0
sLSLSEFEEGSYGWR	2	1	1	Q6ZQN7	S1(Phospho)	0	S(1): 50.0; S(3): 50.0; S(5): 0.0; S(11): 0.0; Y(12): 0.0	4.1933e+07	0	5.194e-16	63.35	1.51199e-05	2	1826.76	-0.333589	35.0784	0
RLsASPsQIEVSALSSDPQR	2	1	1	Q6ZQN7	S3(Phospho); S7(Phospho)	0	S(3): 50.5; S(5): 50.5; S(7): 99.1; S(12): 0.0; S(15): 0.0; S(16): 0.0	5.37425e+06	0	2.009e-08	31.57	0.0338909	3	2288.03	-1.10539	28.8093	1
sSPVEFEcINEK	2	1	1	O75131	S1(Phospho); C8(Carbamidomethyl)	0	S(1): 50.0; S(2): 50.0	7392172	0	0.0003842	47.54	0.000361205	2	1518.62	1.00899	23.1655	0
SFsADNFIGIQR	1	1	1	Q8N7R7	S3(Phospho)	0	S(1): 0.0; S(3): 100.0	5.3411e+06	0	0.0002889	74.8	9.85115e-07	2	1434.64	-1.8561	31.4347	0
SSsPVQVEEEPVR	3	1	1	Q8IZ21	S3(Phospho)	0	S(1): 0.0; S(2): 0.0; S(3): 100.0	5.74901e+06	0.001	0.02278	28.17	0.0449596	2	1522.68	1.01072	18.1145	0
sLPITIEMLK	1	1	1	Q8IZ21	S1(Phospho)	0	S(1): 100.0; T(5): 0.0	2.32382e+06	0.001	0.005408	23.28	0.101497	2	1224.63	0.320876	36.4959	0
sLGGAVGSVASGAR	1	1	1	Q8NHG8	S1(Phospho)	0	S(1): 100.0; S(8): 0.0; S(11): 0.0	5.80787e+06	0	5.141e-05	73	1.40834e-06	2	1268.6	0.290726	21.4051	0
HTLGDsDNES	1	1	1	P02794	S6(Phospho)	0	T(2): 0.0; S(6): 100.0; S(10): 0.0	4.32033e+07	0	0.001201	67.79	1.13944e-06	2	1154.4	0.453788	11.3374	0
HTLGDsDnES	1	1	1	P02794	S6(Phospho); N8(Deamidated)	0	T(2): 0.0; S(6): 98.1; S(10): 1.9	2.3205e+06	0.007	0.1666	19.98	0.0472169	2	1155.38	0.447161	12.0991	0
FLQPGsPR	1	3	1	P08263	S6(Phospho)	0	S(6): 100.0	1.52931e+07	0.003	0.09053	30.91	0.0111507	2	981.456	0.464459	18.0876	0
SLsTSGESLYHVLGLDK	5	1	1	Q9H3Z4	S3(Phospho)	0	S(1): 0.7; S(3): 99.3; T(4): 0.0; S(5): 0.0; S(8): 0.0; Y(10): 0.0	3.17766e+07	0	2.874e-05	71.32	3.0623e-06	2	1885.9	0.63265	33.2752	0
LGSQHsPGR	1	1	1	Q8IZP0	S6(Phospho)	0	S(3): 0.0; S(6): 100.0	6.43335e+06	0	0.01036	46.85	0.000258173	2	1018.45	-0.0407465	9.27157	0
TGtLSR	1	2	1	Q8IZP0	T3(Phospho)	0	T(1): 0.0; T(3): 100.0; S(5): 0.0	1.82567e+06	0.007	0.1627	45.42	0.000248323	2	714.317	-1.02315	10.5531	0
TANQASDtFSGIGK	2	1	1	Q15847	T8(Phospho)	0	T(1): 0.0; S(6): 0.8; T(8): 98.5; S(10): 0.8	3.36808e+06	0	0.002325	35.89	0.00772896	2	1476.64	0.29815	18.5007	0
LHPDEDDTLVESPAVTPVsAR	1	1	1	P98161	S19(Phospho)	0	T(8): 0.0; S(12): 0.0; T(16): 0.0; S(19): 100.0	3.11728e+06	0	0.004852	51.1	0.000407142	3	2328.07	-2.29232	26.1455	0
LGELGPPsPGLNWEQPQAAR	2	1	1	P98161	S8(Phospho)	0	S(8): 100.0	1.08319e+07	0	0.002252	31.39	0.0353614	3	2197.05	1.41002	32.4866	0
RQsLATK	1	1	1	O00159	S3(Phospho)	0	S(3): 100.0; T(6): 0.0	1.56425e+06	0.007	0.1595	30.34	0.0104491	2	883.44	0.210167	9.36389	1
DVEsPSWR	1	1	1	O00159	S4(Phospho)	0	S(4): 100.0; S(6): 0.0	2.5127e+06	0.005	0.05858	22.74	0.0513484	2	1055.42	0.065275	19.9078	0
TQtPPVSPAPQPTEER	1	1	1	Q14247	T3(Phospho)	0	T(1): 0.0; T(3): 100.0; S(7): 0.0; T(13): 0.0	4.9627e+06	0.001	0.02505	24.82	0.127724	2	1814.83	0.116093	18.1575	0
GILDVQsVQEK	1	1	1	Q8NHG7	S7(Phospho)	0	S(7): 100.0	7.3078e+06	0	5.263e-05	65.75	7.22387e-06	2	1295.63	1.77691	24.9468	0
NPAGPSAPAtPR	2	1	1	Q9NSD5	T10(Phospho)	0	S(6): 0.0; T(10): 100.0	2.49258e+07	0	0.0001919	62.47	1.27687e-05	2	1215.55	0.371348	13.3311	0
NPAGPsAPAtPR	1	1	1	Q9NSD5	S6(Phospho); T10(Phospho)	0	S(6): 100.0; T(10): 100.0	9841070	0.001	0.03275	28.79	0.024444	2	1295.52	1.08493	16.5324	0
SVsVATGLNMMK	1	1	1	Q9UHR4	S3(Phospho)	0	S(1): 0.0; S(3): 100.0; T(6): 0.0	3.03637e+06	0	0.003162	49.17	0.00025241	2	1317.6	0.535826	28.5701	0
TPASTPVsGTPQASPMIER	3	1	1	Q9UHR4	S8(Phospho)	0	T(1): 0.0; S(4): 0.6; T(5): 0.6; S(8): 49.4; T(10): 49.4; S(14): 0.0	8.08251e+06	0	0.001971	35.29	0.0130596	3	2006.93	0.215804	23.1319	0
TPASTPVsGTPQASPmIER	2	1	1	Q9UHR4	S8(Phospho); M16(Oxidation)	0	T(1): 0.0; S(4): 0.0; T(5): 0.0; S(8): 49.7; T(10): 49.7; S(14): 0.7	1.25952e+07	0	0.001346	28.31	0.0722358	2	2022.93	2.91546	19.8564	0
LLEENETEAVTVPTPsPTPVR	2	1	1	Q9UHR4	S16(Phospho)	0	T(7): 0.0; T(11): 0.0; T(14): 0.0; S(16): 98.3; T(18): 1.7	3.39338e+07	0	0.006459	18.64	0.619581	3	2359.15	1.52905	29.5639	0
TPAsTPVSGtPQASPMIER	5	1	1	Q9UHR4	S4(Phospho); T10(Phospho)	0	T(1): 0.0; S(4): 1.9; T(5): 98.1; S(8): 50.0; T(10): 50.0; S(14): 0.0	5.81743e+06	0.001	0.0247	25.42	0.120142	2	2086.9	2.07504	26.8732	0
APASKPETAAPNDANGTAKPPFLSGEnPFAtVK	3	1	1	Q9UHR4	N27(Deamidated); T31(Phospho)	0	S(4): 0.0; T(8): 0.0; T(17): 0.0; S(24): 0.0; T(31): 100.0	7.58853e+06	0.001	0.02079	18.3	0.891163	4	3376.61	1.19765	29.0355	0
EIEYVEtVTSR	1	1	1	Q9UHR4	T7(Phospho)	0	Y(4): 0.0; T(7): 100.0; T(9): 0.0; S(10): 0.0	1.46097e+07	0	1.791e-13	64.34	9.81064e-06	2	1405.63	2.84386	22.8677	0
TPASTPVSGtPQASPMIER	3	1	1	Q9UHR4	T10(Phospho)	0	T(1): 0.0; S(4): 0.0; T(5): 0.0; S(8): 0.0; T(10): 100.0; S(14): 0.0	1.32986e+07	0	6.631e-07	57.44	7.94229e-05	2	2006.93	0.769924	23.1754	0
KDYDtLSK	1	1	1	Q9UHR4	T5(Phospho)	0	Y(3): 0.0; T(5): 100.0; S(7): 0.0	1.06686e+06	0.004	0.02027	54.78	4.87346e-05	2	1049.46	9.0855	11.3658	1
TPASTPVSGtPQAsPMIER	4	1	1	Q9UHR4	T10(Phospho); S14(Phospho)	0	T(1): 0.0; S(4): 0.5; T(5): 33.2; S(8): 33.2; T(10): 33.2; S(14): 100.0	6.9211e+06	0	5.029e-11	30.67	0.0351386	2	2086.9	1.84107	26.563	0
APASKPETAAPnDANGTAKPPFLSGENPFAtVK	3	1	1	Q9UHR4	N12(Deamidated); T31(Phospho)	0	S(4): 0.0; T(8): 0.0; T(17): 2.3; S(24): 2.3; T(31): 95.3	8.84142e+06	0.006	0.04999	14.26	2.23296	4	3376.62	2.2099	29.3415	0
TPASTPVsGTPQAsPMIER	7	1	1	Q9UHR4	S8(Phospho); S14(Phospho)	0	T(1): 0.0; S(4): 0.0; T(5): 0.0; S(8): 50.0; T(10): 50.0; S(14): 100.0	8.50266e+06	0	0.0006321	27.11	0.0827751	3	2086.89	1.27893	26.4739	0
TPASTPVSGtPQASPmIER	2	1	1	Q9UHR4	T10(Phospho); M16(Oxidation)	0	T(1): 0.0; S(4): 24.9; T(5): 24.9; S(8): 24.9; T(10): 24.9; S(14): 0.5	1.25677e+07	0.001	0.004845	19.12	0.614145	2	2022.93	4.7861	19.972	0
TPASTPVsGTPQAsPmIER	2	1	1	Q9UHR4	S8(Phospho); S14(Phospho); M16(Oxidation)	0	T(1): 0.0; S(4): 1.1; T(5): 34.0; S(8): 34.0; T(10): 34.0; S(14): 96.8	3.92191e+06	0.005	0.02812	17.2	0.807915	3	2102.88	-1.3049	23.5726	0
HAEAtLGSGNLR	1	2	1	Q7L9L4	T5(Phospho)	0	T(5): 100.0; S(8): 0.0	2.28641e+07	0	0.001914	38.05	0.00345469	2	1305.59	-0.738898	14.3687	0
AGGsPTAVR	1	1	1	Q9HBB8	S4(Phospho)	0	S(4): 100.0; T(6): 0.0	4.81517e+07	0	0.00177	63.24	3.79394e-06	2	895.403	-0.413891	10.9481	0
GADsGEEKEEGINR	1	1	1	Q9BVG4	S4(Phospho)	0	S(4): 100.0	3.56229e+06	0	5.6e-05	62.69	1.18958e-05	2	1570.64	1.28102	11.0473	1
TTWGDGGENsPcNVVSK	3	1	1	O00161	S10(Phospho); C12(Carbamidomethyl)	0	T(1): 1.4; T(2): 1.4; S(10): 97.2; S(16): 0.0	1.02051e+07	0	0.01072	19.72	0.388774	2	1887.76	1.23702	20.5445	0
tTWGDGGENSPcNVVSK	2	1	1	O00161	T1(Phospho); C12(Carbamidomethyl)	0	T(1): 49.7; T(2): 49.7; S(10): 0.6; S(16): 0.0	8.82788e+06	0	0.002268	24.17	0.140497	2	1887.76	0.0730705	20.6316	0
GEPNVSyIcSR	1	2	1	P49841	Y7(Phospho); C9(Carbamidomethyl)	0	S(6): 0.9; Y(7): 99.1; S(10): 0.0	40640038	0	0.001751	62.08	9.60134e-06	2	1361.56	1.16793	18.4718	0
RPsDSGPPAER	1	1	1	Q9BST9	S3(Phospho)	0	S(3): 100.0; S(5): 0.0	9.65819e+06	0	0.007752	38.06	0.00370466	2	1248.54	-0.398665	10.1666	0
LSSsLGR	1	1	1	Q9BST9	S4(Phospho)	0	S(2): 0.0; S(3): 0.7; S(4): 99.3	3.19235e+06	0.007	0.1672	49.39	0.000203116	2	799.372	0.644581	13.6022	0
GVAPADsPEAPR	1	1	1	Q9P2G1	S7(Phospho)	0	S(7): 100.0	5.73625e+06	0	0.002079	59.27	2.5672e-05	2	1246.55	1.86222	15.0354	0
GVAPADsPEAPRR	1	1	1	Q9P2G1	S7(Phospho)	0	S(7): 100.0	2.16789e+06	0.004	0.1216	14.57	1.01251	2	1402.65	1.27423	11.9742	1
GsDAPSLQNR	1	1	1	O95263	S2(Phospho)	0	S(2): 100.0; S(6): 0.0	1.9772e+06	0	0.005783	43.11	0.000647464	2	1124.48	1.90942	13.5064	0
QEPEVEKAsQR	1	1	1	Q8TCC7	S9(Phospho)	0	S(9): 100.0	1.12263e+07	0	0.0008226	58.32	3.57772e-05	2	1380.62	2.0958	10.5091	1
SAsLVTR	1	1	1	Q9H2K8	S3(Phospho)	0	S(1): 0.0; S(3): 100.0; T(6): 0.0	4.4952e+06	0.009	0.1815	47.31	0.00030468	2	813.387	-0.072606	13.8512	0
ASsLEDLVLK	1	1	1	Q15477	S3(Phospho)	0	S(2): 0.0; S(3): 100.0	3.27264e+06	0	0.002051	57.22	4.09688e-05	2	1154.57	1.46275	30.7369	0
ETAGLVEGEPTGAGGGsLSASR	1	1	1	Q8TF65	S17(Phospho)	0	T(2): 0.0; T(11): 0.0; S(17): 99.9; S(19): 0.0; S(21): 0.0	7.74595e+06	0	0.00806	47.89	0.000725808	2	2082.94	1.56085	22.8126	0
GIITDsFGR	1	1	1	Q9BSQ5	S6(Phospho)	0	T(4): 0.0; S(6): 100.0	2.85818e+07	0	0.0003735	56.19	3.95518e-05	2	1045.47	-0.43754	24.9298	0
ISLNPsVR	1	1	1	Q6ZWJ1	S6(Phospho)	0	S(2): 0.0; S(6): 100.0	5.30159e+06	0.006	0.1409	54.94	4.45671e-05	2	965.484	2.15216	20.4467	0
APAAGEsLSGTR	1	1	1	Q9BXI6	S7(Phospho)	0	S(7): 100.0; S(9): 0.0; T(11): 0.0	5.78894e+06	0	0.001157	54.34	6.07413e-05	2	1196.53	3.49961	13.8228	0
AWGPTSQDtIR	1	1	1	Q9BZV1	T9(Phospho)	0	T(5): 0.0; S(6): 0.0; T(9): 100.0	5.69763e+06	0.001	0.01714	52.95	0.000118889	2	1311.57	0.715048	20.3103	0
VTDALPEPEPPGAmAAsEDEEEEEEALEAMQSR	2	1	1	Q9Y3E7	M14(Oxidation); S17(Phospho)	0	T(2): 0.0; S(17): 100.0; S(32): 0.0	2.54148e+07	0	0.000496	38.52	0.011171	3	3653.52	4.24649	33.833	0
VTDALPEPEPPGAmAAsEDEEEEEEALEAmQSR	2	1	1	Q9Y3E7	M14(Oxidation); S17(Phospho); M30(Oxidation)	0	T(2): 0.0; S(17): 100.0; S(32): 0.0	1.99266e+07	0	0.002557	35.35	0.0213993	4	3669.51	4.39585	30.1462	0
VTDALPEPEPPGAMAAsEDEEEEEEALEAMQSR	2	1	1	Q9Y3E7	S17(Phospho)	0	T(2): 50.0; S(17): 50.0; S(32): 0.0	2.8606e+07	0	0.01349	33.07	0.0416485	4	3637.51	-0.173516	35.1532	0
DQIAIPEDtPENTETASVcTK	1	1	1	Q9UHI7	T9(Phospho); C19(Carbamidomethyl)	0	T(9): 97.7; T(13): 1.2; T(15): 1.2; S(17): 0.0; T(20): 0.0	9.02469e+06	0.002	0.06309	28.43	0.0715591	2	2399.03	1.19357	26.0087	0
DPStPLPTEPK	1	1	1	Q9UHI7	T4(Phospho)	0	S(3): 0.0; T(4): 100.0; T(8): 0.0	1.06237e+07	0.007	0.1485	29.36	0.0263042	2	1261.57	-3.88447	19.1183	0
GLAGPPAsPGK	1	1	1	Q9P206	S8(Phospho)	0	S(8): 100.0	6.98757e+06	0	0.01092	46.77	0.000368161	2	1031.49	1.09689	15.4479	0
DQsPPPsPPPSYHPPPPPTK	1	1	1	Q9P206	S3(Phospho); S7(Phospho)	0	S(3): 100.0; S(7): 99.8; S(11): 0.1; Y(12): 0.1; T(19): 0.0	5.31893e+06	0.001	0.03648	26.86	0.106329	3	2279.99	3.52392	21.1585	0
LLGENSVPPsPSR	2	1	1	Q3YBM2	S10(Phospho)	0	S(6): 0.0; S(10): 99.0; S(12): 1.0	1.31641e+07	0	0.005512	29.17	0.0355311	2	1432.68	0.612368	21.11	0
SDLsLGSR	1	1	1	Q96RF0	S4(Phospho)	0	S(1): 0.0; S(4): 100.0; S(7): 0.0	6.87393e+06	0.001	0.02838	51.58	9.55658e-05	2	914.398	0.526864	17.1787	0
SYsLSELSVLQAK	1	1	1	Q9P0V3	S3(Phospho)	0	S(1): 1.0; Y(2): 1.0; S(3): 98.0; S(5): 0.0; S(8): 0.0	0	0	0.0005596	39.47	0.00305045	2	1504.73	-0.955227	32.8749	0
SVWTAPAQPSGPsPELQGQR	2	1	1	Q8WTX9	S13(Phospho)	0	S(1): 0.0; T(4): 0.0; S(10): 1.0; S(13): 99.0	1.48457e+07	0	0.000426	34.95	0.0153387	2	2173.01	2.31313	26.1744	0
KSsLVTSK	1	1	1	O43768	S3(Phospho)	0	S(2): 1.1; S(3): 98.9; T(6): 0.0; S(7): 0.0	1.70809e+06	0.008	0.1716	25.44	0.032005	2	929.47	-0.709194	10.0906	1
NEDETDRPSLEsAnGK	1	1	1	Q3SXY8	S12(Phospho); N14(Deamidated)	0	T(5): 0.0; S(9): 0.0; S(12): 100.0	2.09969e+07	0	0.001585	19.3	0.321922	2	1842.74	2.61225	13.4791	0
KPLPPLAVPQRPNsDAHDVIS	2	1	1	Q3SXY8	S14(Phospho)	0	S(14): 2.5; S(21): 97.5	2.80915e+07	0.006	0.04413	11.72	1.83386	3	2331.19	2.29622	26.8987	0
KPNVsPEK	1	1	1	Q9HCH5	S5(Phospho)	0	S(5): 100.0	7.01317e+06	0.001	0.02915	47.56	0.000228004	2	978.468	1.92501	9.70364	0
APGsPAAPR	1	1	1	Q9NQX5	S4(Phospho)	0	S(4): 100.0	2.97711e+07	0	0.003607	47.48	0.000245642	2	903.408	0.0360461	11.3043	0
ASsLGEIDESSELR	2	1	1	Q16513	S3(Phospho)	0	S(2): 1.3; S(3): 98.7; S(10): 0.0; S(11): 0.0	3.11306e+06	0	0.0003021	47.16	0.000457696	2	1572.68	0.180913	23.9892	0
sDPLLIGIPTSENPFK	1	1	1	Q9UBI6	S1(Phospho)	0	S(1): 100.0; T(10): 0.0; S(11): 0.0	3.1802e+07	0.003	0.1126	25.54	0.0900595	2	1807.9	5.07659	39.1887	0
TAsTNnIAQAR	2	1	1	Q9UBI6	S3(Phospho); N6(Deamidated)	0	T(1): 0.0; S(3): 100.0; T(4): 0.0	7.05865e+06	0	0.001916	29.83	0.0194985	2	1227.54	0.181227	13.7525	0
TTVyVVEDQR	1	1	1	Q9H1C7	Y4(Phospho)	0	T(1): 1.1; T(2): 97.8; Y(4): 1.1	4.43217e+06	0.002	0.05177	22.12	0.13871	2	1289.58	2.61618	17.6419	0
EDDTAsVSTATR	1	1	1	Q96J84	S6(Phospho)	0	T(4): 0.0; S(6): 100.0; S(8): 0.0; T(9): 0.0; T(11): 0.0	1.70731e+06	0.001	0.01674	45.38	0.000389693	2	1332.53	0.908152	13.2417	0
EGLSEsVR	1	1	1	Q6PHR2	S6(Phospho)	0	S(4): 0.0; S(6): 100.0	5.65579e+06	0.001	0.04361	44.88	0.000406359	2	956.409	0.109404	14.7598	0
IPsLAELETIEQEEASSRPK	2	1	1	Q695T7	S3(Phospho)	0	S(3): 100.0; T(9): 0.0; S(16): 0.0; S(17): 0.0	1.25194e+07	0	0.00265	30.56	0.0399955	3	2307.12	1.82331	31.5346	0
IPSLAELETIEQEEAsSRPK	2	1	1	Q695T7	S16(Phospho)	0	S(3): 0.0; T(9): 0.0; S(16): 100.0; S(17): 0.0	2.1576e+07	0	8.861e-06	49.18	0.000549555	3	2307.12	1.66458	31.1914	0
NHcQKPGDHQGLVSTLSTAsMnGDLKY	1	1	1	Q695T7	C3(Carbamidomethyl); S20(Phospho); N22(Deamidated)	0	S(14): 2.3; T(15): 2.3; S(17): 2.3; T(18): 2.3; S(20): 90.8; Y(27): 0.0	9762954	0	0.003248	12.7	3.85589	4	3039.34	1.65941	28.8488	1
ELFDDPsYVNVQNLDK	2	1	1	P29353	S7(Phospho)	0	S(7): 50.0; Y(8): 50.0	5.66804e+06	0	0.0001036	33.95	0.016894	2	1975.88	5.07892	31.8924	0
HGsFVNKPTR	1	1	1	P29353	S3(Phospho)	0	S(3): 100.0; T(9): 0.0	4.18789e+06	0.002	0.0514	38.6	0.00305065	2	1222.57	0.524817	11.208	0
KQtPVPDKK	2	1	1	Q9Y496	T3(Phospho)	0	T(3): 100.0	1.04377e+07	0.002	0.06021	29.5	0.0230014	2	1120.58	0.188576	9.16578	2
LTFDSSFsPNTGK	1	1	1	P21796	S8(Phospho)	0	T(2): 0.0; S(5): 0.0; S(6): 0.0; S(8): 100.0; T(11): 0.0	0	0	0.005724	43.84	0.00102436	2	1480.64	-0.38155	26.6592	0
ALAAGADsPK	1	1	1	Q4KMP7	S8(Phospho)	0	S(8): 100.0	2.08521e+06	0	0.00529	41.26	0.000834209	2	980.445	0.45673	12.2653	0
AAGGAPsPPPPVR	1	1	1	Q4KMP7	S7(Phospho)	0	S(7): 100.0	5.3534e+06	0	0.005261	23.62	0.120794	2	1253.61	1.19813	17.157	0
LVAEDAPsPAAPPLSSGGPR	1	1	1	O60658	S8(Phospho)	0	S(8): 49.6; S(15): 49.6; S(16): 0.9	9.91796e+06	0.001	0.01967	12.37	2.2337	2	1968.95	2.49734	25.236	0
KGsLDVK	1	1	1	O60658	S3(Phospho)	0	S(3): 100.0	1.19373e+07	0.004	0.1179	43.54	0.000553235	2	826.407	0.416177	10.7145	1
IQQLVNtLK	1	1	1	Q9Y2E4	T7(Phospho)	0	T(7): 100.0	5.77194e+06	0.001	0.01878	24.76	0.0601551	2	1136.61	-0.815866	20.6784	0
SHNPVPLsPLR	2	1	1	O95398	S8(Phospho)	0	S(1): 0.0; S(8): 100.0	1.668e+07	0.002	0.06079	34.38	0.00911885	3	1296.65	0.0694225	24.6634	0
LEnGcGNAsPQmK	1	1	1	O95398	N3(Deamidated); C5(Carbamidomethyl); S9(Phospho); M12(Oxidation)	0	S(9): 100.0	3.81957e+06	0.003	0.08144	26.8	0.0292501	2	1502.56	-0.301109	11.1909	0
DTRLsNLLR	1	1	1	O95398	S5(Phospho)	0	T(2): 0.0; S(5): 100.0	4.82465e+06	0.004	0.1237	22.82	0.102912	2	1167.59	1.1244	27.3727	1
RPVsAVGYK	1	1	1	O15066	S4(Phospho)	0	S(4): 100.0; Y(8): 0.0	2.77697e+06	0.003	0.1126	27.16	0.0321156	2	1056.52	-1.11847	12.6977	0
STGPGAsLGTGYDR	1	1	1	O15551	S7(Phospho)	0	S(1): 2.2; T(2): 2.2; S(7): 93.4; T(10): 0.1; Y(12): 2.2	1.88813e+06	0.003	0.1096	40.57	0.00167507	2	1418.59	-5.62723	18.2548	0
NTAsLNSR	1	1	1	O00522	S4(Phospho)	0	T(2): 0.0; S(4): 100.0; S(7): 0.0	4.97598e+06	0.003	0.09997	39.16	0.00146213	2	942.404	0.0839006	10.8445	0
PSsVTALGQAR	1	1	1	Q86WA9	S3(Phospho)	0	S(2): 0.0; S(3): 100.0; T(5): 0.0	1.46207e+06	0.003	0.1126	38.81	0.00274224	2	1166.57	8.67133	16.7912	0
TIsSLEEIVEK	2	1	1	Q8IY95	S3(Phospho)	0	T(1): 0.0; S(3): 50.0; S(4): 50.0	5.98058e+06	0	0.006044	38.79	0.0032636	2	1327.64	-1.91766	30.9698	0
TISsLEEIVEK	1	1	1	Q8IY95	S4(Phospho)	0	T(1): 0.0; S(3): 0.0; S(4): 100.0	6.63325e+06	0	5.804e-08	60.55	2.22465e-05	2	1327.64	-0.906254	31.0843	0
EEPVLtLVDEAIVK	1	1	1	Q02156	T6(Phospho)	0	T(6): 100.0	4.60501e+06	0	0.003933	38.75	0.00387388	2	1634.83	-1.36072	39.5143	0
KGHEyTNIK	1	1	1	Q06124	Y5(Phospho)	0	Y(5): 99.3; T(6): 0.7	2.97643e+06	0	0.01243	38.66	0.00302241	2	1169.54	0.826004	10.5565	1
LGsPAVsPLPVR	1	1	1	Q06495	S3(Phospho); S7(Phospho)	0	S(3): 100.0; S(7): 100.0	4.80021e+06	0.001	0.0362	38.33	0.00381186	2	1352.64	-0.859922	32.9523	0
VFLEELPPATPsPR	2	1	1	Q06495	S12(Phospho)	0	T(10): 1.2; S(12): 98.8	2.19159e+07	0.003	0.106	14.99	0.992075	2	1632.8	0.604229	31.6952	0
sPPLPPR	1	1	1	Q06495	S1(Phospho)	0	S(1): 100.0	2.14986e+07	0.008	0.0961	22.96	0.0642397	2	843.412	-0.0844019	16.8358	0
tPPVVIK	1	1	1	Q96A49	T1(Phospho)	0	T(1): 100.0	2.96465e+06	0.001	0.03151	37.71	0.00231277	2	833.454	0.905618	19.7381	0
sPPPPYPGNAR	1	1	1	Q96J86	S1(Phospho)	0	S(1): 100.0; Y(6): 0.0	1.69423e+07	0	0.01173	37.19	0.00355233	2	1232.55	0.936629	16.0002	0
sIEVENDFLPVEK	1	1	1	Q96B97	S1(Phospho)	0	S(1): 100.0	1.1469e+07	0	0.001664	36.39	0.00795616	2	1598.74	0.770204	32.6591	0
sIEVEnDFLPVEK	1	1	1	Q96B97	S1(Phospho); N6(Deamidated)	0	S(1): 100.0	1.58302e+06	0	1.176e-11	48.62	0.000463739	2	1599.72	-0.0741574	32.676	0
EDEKsIQsQEPK	1	1	1	P82251	S5(Phospho); S8(Phospho)	0	S(5): 100.0; S(8): 100.0	7.12487e+06	0	0.01388	36.18	0.00410889	2	1577.61	1.05378	12.2806	1
sIQsQEPK	1	1	1	P82251	S1(Phospho); S4(Phospho)	0	S(1): 100.0; S(4): 100.0	1.26949e+07	0.004	0.1164	20.72	0.0724379	2	1076.41	-0.300985	15.5319	0
sIQSQEPK	2	1	1	P82251	S1(Phospho)	0	S(1): 100.0; S(4): 0.0	26895425	0.001	0.005335	37.8	0.00209938	2	996.44	0.248625	11.2957	0
AVsTEELEATVQEVLGR	2	1	1	K7EJ46	S3(Phospho)	0	S(3): 50.0; T(4): 50.0; T(10): 0.0	4.11103e+06	0	0.001603	36.05	0.0103919	3	1910.91	-0.368394	40.6906	0
AVStEELEATVQEVLGR	1	1	1	K7EJ46	T4(Phospho)	0	S(3): 50.0; T(4): 50.0; T(10): 0.0	1.06421e+07	0	2.55e-06	10.11	3.98771	3	1910.91	0.877279	40.8202	0
TYAEISQAFsK	1	1	1	Q9NRM0	S10(Phospho)	0	T(1): 0.0; Y(2): 0.0; S(6): 0.0; S(10): 100.0	2.41667e+06	0.001	0.02643	36.01	0.00566381	2	1324.58	0.619849	23.6198	0
EDEIsPPPPNPVVK	1	1	1	P10644	S5(Phospho)	0	S(5): 100.0	3.45679e+06	0	0.00311	35.88	0.00850855	2	1597.75	2.14666	24.2344	0
tDSREDEISPPPPNPVVK	2	1	1	P10644	T1(Phospho)	0	T(1): 50.0; S(3): 50.0; S(9): 0.0	3.89373e+06	0.003	0.08605	12.74	2.47962	3	2056.97	5.62904	22.5938	1
TDSREDEIsPPPPNPVVK	1	1	1	P10644	S9(Phospho)	0	T(1): 0.0; S(3): 0.0; S(9): 100.0	6.25264e+06	0.001	0.007715	20.43	0.436563	3	2056.96	-0.0680537	22.1724	1
AEDGATPSPsNETPK	1	1	1	P29966	S10(Phospho)	0	T(6): 0.0; S(8): 0.0; S(10): 98.7; T(13): 1.2	2.48239e+07	0.001	0.03802	24.38	0.0913709	2	1580.65	0.288861	12.4394	0
VnGDAsPAAAESGAK	1	1	1	P29966	N2(Deamidated); S6(Phospho)	0	S(6): 100.0; S(12): 0.0	3.06594e+06	0	8.949e-06	35.1	0.0062733	2	1425.59	-0.188956	13.1138	0
AEDGATPSPSNEtPK	1	1	1	P29966	T13(Phospho)	0	T(6): 0.0; S(8): 0.0; S(10): 0.9; T(13): 99.1	2.35901e+07	0	1e-05	39.22	0.00299185	2	1580.65	0.211633	12.5003	0
SPsTDNVVNVDFTPR	3	1	1	P48764	S3(Phospho)	0	S(1): 1.1; S(3): 97.8; T(4): 1.1; T(13): 0.0	8.06535e+06	0	0.0004623	34.6	0.0133667	2	1727.76	0.439641	28.9629	0
SPStDNVVNVDFTPR	3	1	1	P48764	T4(Phospho)	0	S(1): 0.4; S(3): 49.8; T(4): 49.8; T(13): 0.0	7.55943e+06	0	5.423e-05	44.19	0.0014652	2	1727.77	1.78203	29.0659	0
DNsPPPAFKPEPPK	1	1	1	Q9UDY2	S3(Phospho)	0	S(3): 100.0	7.81207e+06	0.003	0.09075	14.09	1.13278	2	1600.75	3.88165	19.7001	0
TAsFSESR	1	1	1	P53396	S3(Phospho)	0	T(1): 0.0; S(3): 100.0; S(5): 0.0; S(7): 0.0	2.05756e+06	0.007	0.1663	33.86	0.00569442	2	964.375	-2.17101	12.3245	0
GPAsPLEAK	1	1	1	Q13099	S4(Phospho)	0	S(4): 100.0	3.61008e+06	0.001	0.02535	33.63	0.00669774	2	949.438	-1.24125	15.5355	0
SAsEPSLHR	1	2	1	P10398	S3(Phospho)	0	S(1): 0.0; S(3): 100.0; S(6): 0.0	7.03952e+06	0.002	0.05327	33.49	0.00873041	2	1063.46	-0.820047	11.2947	0
SVPsEKETEAK	1	1	1	Q9Y226	S4(Phospho)	0	S(1): 0.0; S(4): 100.0; T(8): 0.0	7.69991e+06	0.008	0.1764	33.24	0.0107653	2	1284.57	0.843351	10.3222	1
TGsVGSDLQFLGTTSSHQEK	1	1	1	Q9Y4F4	S3(Phospho)	0	T(1): 50.0; S(3): 50.0; S(6): 0.0; T(13): 0.0; T(14): 0.0; S(15): 0.0; S(16): 0.0	2.45983e+06	0.003	0.0787	33.11	0.0242616	3	2158.96	-1.04932	26.6119	0
GLGEIPLDTPsAK	1	1	1	Q9Y4F4	S11(Phospho)	0	T(9): 0.0; S(11): 100.0	1.99961e+07	0.005	0.1312	14.73	0.784072	2	1377.67	-0.108209	28.7657	0
SSsPELVTHLK	2	1	1	Q07960	S3(Phospho)	0	S(1): 0.0; S(2): 0.0; S(3): 99.9; T(8): 0.0	6.54387e+06	0.002	0.05801	19.83	0.247501	2	1277.61	0.528471	20.5628	0
AsYISSAR	1	1	1	Q3LXA3	S2(Phospho)	0	S(2): 100.0; Y(3): 0.0; S(5): 0.0; S(6): 0.0	5.38415e+06	0.007	0.1619	32.25	0.00819035	2	934.403	-0.403264	13.8194	0
DIFGVSEsPPR	1	1	1	Q9P2N2	S8(Phospho)	0	S(6): 0.0; S(8): 100.0	1.47759e+06	0.002	0.06891	31.27	0.0168697	2	1283.57	0.283562	30.781	0
IPPsTPR	1	1	1	Q92643	S4(Phospho)	0	S(4): 99.3; T(5): 0.7	2.60299e+07	0.004	0.1231	31.03	0.0115174	2	847.407	-0.0555855	13.2926	0
DQTASAPAtPLVNK	1	1	1	Q53SF7	T9(Phospho)	0	T(3): 1.2; S(5): 0.0; T(9): 98.8	3.89321e+06	0.004	0.1195	30.71	0.0248385	2	1492.7	-2.11886	19.2439	0
tSQEGPGDSVK	2	1	1	Q9NSK0	T1(Phospho)	0	T(1): 50.0; S(2): 50.0; S(9): 0.0	2.94738e+06	0.001	0.02341	30.67	0.0119128	2	1184.48	-0.0527443	11.2982	0
sSELLVR	1	1	1	Q9NSK0	S1(Phospho)	0	S(1): 99.2; S(2): 0.8	2.82622e+06	0.004	0.04595	38.5	0.00202699	2	883.428	-0.757607	20.4063	0
FAGHSEAGGGsGDR	1	1	1	O96013	S11(Phospho)	0	S(5): 0.0; S(11): 100.0	2.0743e+06	0.001	0.01708	27.79	0.020959	2	1384.53	-0.7521	10.1107	0
RDsPPPPAR	1	1	1	O96013	S3(Phospho)	0	S(3): 100.0	4.29914e+07	0.001	0.03962	27.02	0.0336643	2	1072.49	0.441824	10.0633	1
GNVVPsPLPTR	1	1	1	Q9Y2V2	S6(Phospho)	0	S(6): 100.0; T(10): 0.0	7629137	0.009	0.188	29.3	0.0259652	2	1216.61	1.86185	23.7742	0
TFsATVR	1	1	1	Q9Y2V2	S3(Phospho)	0	T(1): 0.0; S(3): 100.0; T(5): 0.0	4.4615e+06	0.008	0.06735	31.53	0.00906963	2	861.388	1.34858	16.9263	0
REsISLTPVAK	1	1	1	O00337	S3(Phospho)	0	S(3): 100.0; S(5): 0.0; T(7): 0.0	1.70931e+07	0.003	0.11	27.57	0.0416464	2	1280.66	0.86258	21.9014	1
VLAVTDsPAR	1	1	1	O94956	S7(Phospho)	0	T(5): 0.0; S(7): 100.0	1.08785e+07	0	0.01375	26.94	0.0352005	2	1108.54	0.523727	17.82	0
VDsTTcLFPVEEK	1	1	1	Q06210	S3(Phospho); C6(Carbamidomethyl)	0	S(3): 97.8; T(4): 1.1; T(5): 1.1	5.20927e+06	0.004	0.1253	26.56	0.0600577	2	1604.69	-2.65155	30.0282	0
TSsIQPSFR	1	1	1	Q6UXY8	S3(Phospho)	0	T(1): 0.0; S(2): 0.0; S(3): 100.0; S(7): 0.0	3.58653e+06	0.001	0.03145	26.03	0.0416597	2	1102.49	-0.383731	18.2803	0
EAHESTPEISERPAGEcPAGGGAAENsSLGQEQPEAPSR	5	1	1	Q2M3M2	C17(Carbamidomethyl); S27(Phospho)	0	S(5): 0.8; T(6): 24.8; S(10): 24.8; S(27): 24.8; S(28): 24.8; S(38): 0.0	2.89591e+07	0	0.005821	25.3	0.275938	4	4069.74	-1.14753	20.6261	0
EAHEStPEISERPAGEcPAGGGAAENSSLGQEQPEAPSR	5	1	1	Q2M3M2	T6(Phospho); C17(Carbamidomethyl)	0	S(5): 49.5; T(6): 49.5; S(10): 1.0; S(27): 0.0; S(28): 0.0; S(38): 0.0	2.47336e+07	0	3.046e-05	30.7	0.08039	4	4069.74	-0.667619	20.712	0
VSGsFPEDSSK	1	1	1	O15400	S4(Phospho)	0	S(2): 1.6; S(4): 98.4; S(9): 0.0; S(10): 0.0	7514185	0.001	0.02323	24.86	0.0398437	2	1219.49	-0.0424215	15.8837	0
VNQSALEAVTPsPSFQQR	1	1	1	Q9UKG1	S12(Phospho)	0	S(4): 0.0; T(10): 1.3; S(12): 97.4; S(14): 1.3	4.57664e+06	0.002	0.07199	21.8	0.262956	2	2038.96	-0.201243	26.4627	0
GQGsSPVAMQK	1	1	1	P18206	S4(Phospho)	0	S(4): 98.4; S(5): 1.6	2.26226e+06	0.002	0.05424	20.01	0.18657	2	1169.5	0.948374	12.4428	0
LDsPTMSR	1	1	1	P19634	S3(Phospho)	0	S(3): 100.0; T(5): 0.0; S(7): 0.0	1.8147e+06	0.003	0.1093	21.88	0.0609716	2	986.402	0.403144	13.8752	0
SPVVSGDTsPR	2	1	1	P10636	S9(Phospho)	0.0435	S(1): 0.0; S(5): 0.0; T(8): 0.9; S(9): 99.1	9.87154e+06	0.003	0.1004	22.26	0.103704	2	1181.52	3.58279	13.5597	0
SGYSsPGSPGTPGSR	1	1	1	P10636	S5(Phospho)	0	S(1): 0.0; Y(3): 0.0; S(4): 0.0; S(5): 0.1; S(8): 97.8; T(11): 2.1; S(14): 0.1	4.23767e+06	0.006	0.05035	15.43	0.594317	2	1473.6	0.000838932	13.823	0
SGYSSPGsPGTPGSR	1	1	1	P10636	S8(Phospho)	0	S(1): 0.0; Y(3): 0.0; S(4): 1.8; S(5): 0.0; S(8): 98.0; T(11): 0.0; S(14): 0.0	3677613	0	0.004331	28.04	0.0326635	2	1473.6	0.580705	13.8618	0
EATNTTSEPSAPSQDLLDLSPsPR	2	1	1	O75674	S22(Phospho)	0	T(3): 0.0; T(5): 0.0; T(6): 0.0; S(7): 0.0; S(10): 0.0; S(13): 0.0; S(20): 0.0; S(22): 100.0	3.55444e+07	0	0.004261	23.36	0.280481	3	2593.16	-4.26915	31.0138	0
FEPGtQR	1	3	1	Q70IA8	T5(Phospho)	0	T(5): 100.0	1.91201e+06	0.006	0.1384	21.21	0.0718991	2	914.376	-0.66169	12.162	0
VPPsPDDLPSR	1	1	1	Q8IYJ3	S4(Phospho)	0	S(4): 100.0; S(10): 0.0	45447850	0.002	0.07053	21.7	0.169021	2	1259.57	1.35502	19.376	0
AHAWPSPyKDYEVK	1	1	1	Q8NFJ5	Y8(Phospho)	0	S(6): 0.0; Y(8): 98.8; Y(11): 1.2	7.39439e+06	0.002	0.06486	27.87	0.0570752	3	1770.79	-0.50054	23.057	1
AHAWPsPYK	1	1	1	Q8NFJ5	S6(Phospho)	0	S(6): 100.0; Y(8): 0.0	1.00088e+07	0.006	0.1413	15.74	0.366693	2	1136.49	-0.020291	20.5954	0
AHAWPsPYKDYEVK	2	1	1	Q8NFJ5	S6(Phospho)	0	S(6): 100.0; Y(8): 0.0; Y(11): 0.0	2.08773e+07	0.001	0.005335	31.41	0.0256222	3	1770.79	0.533493	24.4863	1
TDKPYsAK	1	1	1	O14493	S6(Phospho)	0	T(1): 0.0; Y(5): 0.0; S(6): 100.0	1.75297e+06	0.008	0.1726	22.67	0.065972	2	989.433	-0.776401	9.87121	0
LRGEDDYNMDENEAEsETDKQAALAGNDR	1	1	1	Q8NBJ4	S16(Phospho)	0	Y(7): 0.0; S(16): 100.0; T(18): 0.0	5.46929e+07	0	5.941e-06	45.52	0.000937015	3	3336.36	0.329278	38.1716	2
LRGEDDYNmDENEAEsETDKQAALAGNDR	1	1	1	Q8NBJ4	M9(Oxidation); S16(Phospho)	0	Y(7): 100.0; S(16): 0.0; T(18): 0.0	53733483	0	1.998e-05	37.84	0.00494956	3	3352.35	-2.05168	35.2236	2
ETAVsTEDDSHHKAEK	3	1	1	Q14515	S5(Phospho)	0	T(2): 0.0; S(5): 100.0; T(6): 0.0; S(10): 0.0	9.1471e+06	0	0.0003246	42.49	0.00138655	2	1863.78	1.88333	10.4303	1
QEVNPVRQEIESETTsEEQIQEEK	1	1	1	P13611	S16(Phospho)	0	S(12): 0.0; T(14): 0.0; T(15): 0.0; S(16): 100.0	1.45576e+07	0	8.041e-05	55.41	0.000114377	3	2939.33	4.06366	42.2818	1
GREEHyEEEEEEEEDGAAVAEK	1	1	1	O00461	Y6(Phospho)	0	Y(6): 100.0	3.00512e+07	0	0.0006002	48.39	0.00031221	3	2644.01	-4.28468	31.8144	1
GREEHYEEEEEEEEDGAAVAEKsHR	1	1	1	O00461	S23(Phospho)	0	Y(6): 100.0; S(23): 0.0	2.55775e+07	0	0.0001649	31.73	0.020915	4	3024.2	-3.32081	28.0064	2
LYPELSQYmGLsLNEEEIR	1	1	1	O00560	M9(Oxidation); S12(Phospho)	0	Y(2): 0.0; S(6): 0.0; Y(8): 0.0; S(12): 100.0	1.14227e+07	0	9.518e-11	57.72	0.000100159	3	2380.08	0.157105	33.8543	0
SGFSSIsVSR	1	2	1	P04259	S7(Phospho)	0	S(1): 0.0; S(4): 0.0; S(5): 0.0; S(7): 98.8; S(9): 1.2	1.60774e+06	0.004	0.04887	33.73	0.00785858	2	1106.49	0.126832	20.9708	0
SKGDDATLPsFR	1	1	1	Q8N392	S10(Phospho)	0	S(1): 0.0; T(7): 0.0; S(10): 100.0	1.82733e+07	0	9.286e-09	55.49	7.20344e-05	2	1373.61	-0.773236	22.4173	1
QLsSGVSEIR	1	1	1	P04792	S3(Phospho)	0	S(3): 100.0; S(4): 0.0; S(7): 0.0	1.82038e+07	0	8.293e-10	62.72	1.26157e-05	2	1155.54	0.724452	18.9154	0
VIEDNEyTAR	1	2	1	P07948	Y7(Phospho)	0	Y(7): 99.3; T(8): 0.7	3.90629e+06	0	4.787e-14	69.7	2.17518e-06	2	1289.54	1.19869	13.1198	0
LPGsPGLSK	1	1	1	Q8N9U0	S4(Phospho)	0	S(4): 100.0; S(8): 0.0	4.68302e+06	0.001	0.005335	64.22	6.49029e-06	2	935.459	-0.714361	16.834	0
SLDTITLsGDER	1	1	1	Q8N9U0	S8(Phospho)	0	S(1): 0.0; T(4): 0.0; T(6): 0.0; S(8): 100.0	1.6267e+07	0.007	0.06066	23.57	0.102413	2	1386.61	-4.20877	25.3071	0
LKGPPYSPLDISIFPQSEsR	2	1	1	Q9C0K7	S19(Phospho)	0	Y(6): 0.0; S(7): 0.0; S(12): 0.0; S(17): 50.0; S(19): 50.0	1.03456e+08	0.001	0.005335	21.59	0.303027	3	2311.13	-1.35735	35.7362	1
GPPYSPLDISIFPQSEsR	1	1	1	Q9C0K7	S17(Phospho)	0	Y(4): 0.0; S(5): 0.0; S(10): 0.0; S(15): 50.0; S(17): 50.0	1.93471e+07	0.002	0.02474	19.52	0.463498	3	2069.96	0.442131	39.045	0
GPPYSPLDISIFPQsESR	2	1	1	Q9C0K7	S15(Phospho)	0	Y(4): 0.0; S(5): 0.0; S(10): 0.0; S(15): 50.0; S(17): 50.0	7.88425e+06	0.005	0.03179	19.78	0.436038	3	2069.96	0.265214	39.0763	0
ENVtPEVLDR	1	1	1	Q6P6B1	T4(Phospho)	0	T(4): 100.0	3.06314e+06	0.001	0.005387	47.9	0.000330849	2	1251.55	-7.15138	21.988	0
HISLtLPATFR	1	1	1	Q9H7P6	T5(Phospho)	0	S(3): 1.1; T(5): 98.9; T(9): 0.0	3.23733e+06	0.004	0.04976	25.48	0.0621491	2	1335.68	-0.40889	30.8597	0
TAsLVTR	1	1	1	Q7L7X3	S3(Phospho)	0	T(1): 0.0; S(3): 100.0; T(6): 0.0	1.76635e+06	0.005	0.06116	44.53	0.000482748	2	827.404	2.18519	14.9292	0
KHDsIKDDSEDLKPVIDGMDGIK	2	1	1	Q05513	S4(Phospho)	0	S(4): 100.0; S(9): 0.0	5.72875e+06	0	2.139e-10	38.15	0.00913294	4	2635.23	0.0334736	29.2268	2
GQHsISYtLSR	1	2	1	Q9HAT8	S4(Phospho); T8(Phospho)	0	S(4): 98.7; S(6): 1.3; Y(7): 1.3; T(8): 98.7; S(10): 0.0	3.63676e+06	0.001	0.005335	41.75	0.0012899	2	1408.57	1.32138	18.2427	0
RPtATGDYDKK	1	1	1	O00501	T3(Phospho)	0	T(3): 100.0; T(5): 0.0; Y(8): 0.0	4.19632e+06	0.001	0.005335	38.16	0.00383419	2	1331.6	0.272307	9.70685	1
DNsPSLK	1	1	1	Q8IY22	S3(Phospho)	0	S(3): 100.0; S(5): 0.0	2.46951e+06	0.005	0.05675	37.44	0.00118999	2	840.349	-0.606256	12.3055	0
GtPGPAVR	1	1	1	O15484	T2(Phospho)	0	T(2): 100.0	3.10037e+06	0.003	0.02598	33.9	0.00661993	2	834.387	0.241249	11.8036	0
KsQENLGNPSK	1	1	1	Q9H0X4	S2(Phospho)	0	S(2): 100.0; S(10): 0.0	3.00572e+06	0.001	0.006156	32.49	0.0123718	2	1281.58	0.302441	10.0614	1
IYHLPDAEsDEDEDFKEQTR	1	1	1	Q15019	S9(Phospho)	0	Y(2): 0.0; S(9): 100.0; T(19): 0.0	4.07948e+07	0	9.148e-15	31.17	0.0419346	3	2517.04	-0.383209	23.1555	1
VYsDEGGK	1	1	1	Q9Y2B5	S3(Phospho)	0	Y(2): 0.0; S(3): 100.0	4.11089e+06	0.001	0.006602	29.5	0.0060589	2	934.356	0.318031	10.7526	0
AAAPAPGccPPtPNPGSR	1	1	1	Q9Y2B5	C8(Carbamidomethyl); C9(Carbamidomethyl); T12(Phospho)	0	T(12): 100.0; S(17): 0.0	7.32709e+06	0.001	0.006815	18.27	0.573404	2	1857.78	2.81949	16.3339	0
TTPATGEQsPGAR	1	1	1	O00308	S9(Phospho)	0	T(1): 0.0; T(2): 0.0; T(5): 50.0; S(9): 50.0	3.90322e+06	0.003	0.03526	28.62	0.0285114	2	1352.58	0.100463	11.1443	0
RAsLSDLTDLEDIEGLTVR	2	1	1	Q8WZ73	S3(Phospho)	0	S(3): 50.0; S(5): 50.0; T(8): 0.0; T(17): 0.0	2.55367e+06	0	2.822e-12	27.21	0.0826969	3	2183.06	0.808944	35.7342	1
ESLKEEDEsDDDNm	1	1	1	P25788	S9(Phospho); M14(Oxidation)	0	S(2): 98.9; S(9): 1.1	7.83338e+06	0.001	0.005335	25.59	0.0196001	2	1751.58	0.540708	12.6037	1
TSLDIEEYsDTEVQK	1	1	1	P51580	S9(Phospho)	0	T(1): 0.0; S(2): 0.0; Y(8): 0.9; S(9): 98.2; T(11): 0.9	2.66436e+06	0.002	0.01463	22.78	0.175304	2	1836.78	-0.85753	24.4512	0
GYADLISsGR	2	1	1	O43520	S8(Phospho)	0	Y(2): 0.0; S(7): 0.9; S(8): 99.1	1.3556e+06	0.006	0.06217	24.91	0.0595657	2	1118.48	-4.2401	23.6963	0
tFcGTPDYIAPEIIAYQPYGK	2	3	1	P05771	T1(Phospho); C3(Carbamidomethyl)	0	T(1): 49.5; T(5): 49.5; Y(8): 0.9; Y(16): 0.0; Y(19): 0.0	2.60367e+06	0	0.001081	20.44	0.489778	3	2484.12	0.291453	37.8729	0
SQEGQGsILETITLIQDcK	3	1	1	O43511	S7(Phospho); C18(Carbamidomethyl)	0	S(1): 1.3; S(7): 97.4; T(11): 1.3; T(13): 0.0	1.89194e+06	0	2.264e-06	25.1	0.160541	3	2200.02	-1.90355	36.7048	0
RPEsEPPSER	1	1	1	Q96A59	S4(Phospho)	0	S(4): 100.0; S(8): 0.0	5.74562e+06	0.002	0.02233	22.49	0.116673	2	1263.54	2.09718	9.96916	0
ASsPQGFDVDR	2	1	1	P27216	S3(Phospho)	0	S(2): 1.1; S(3): 98.9	2.71471e+06	0	0.0005579	48.24	0.000221204	2	1258.51	-2.59898	18.2086	0
SAGGRPGSGPQLGtGR	1	1	1	O14908	T14(Phospho)	0	S(1): 0.0; S(8): 0.1; T(14): 99.9	1.97052e+06	0.008	0.07271	13.97	1.19458	3	1534.71	0.657249	11.7581	0
SVPEVDPAAtMPR	1	1	1	Q6ZVM7	T10(Phospho)	0	S(1): 0.0; T(10): 100.0	2.86095e+06	0.002	0.01256	17.73	0.49163	2	1449.65	0.767851	24.266	0
smAAAAASLGGPR	1	1	1	Q9P0T7	S1(Phospho); M2(Oxidation)	0	S(1): 100.0; S(8): 0.0	1.87324e+06	0	0.0002363	46.45	0.000489163	2	1255.55	-2.08224	16.657	0
sMAAAAASLGGPR	1	1	1	Q9P0T7	S1(Phospho)	0	S(1): 100.0; S(8): 0.0	2.10103e+06	0	9.248e-05	42.66	0.00113549	2	1239.56	0.780636	22.0191	0
TEAGsEEDRVR	1	1	1	O60500	S5(Phospho)	0	T(1): 0.0; S(5): 100.0	1.67393e+07	0.001	0.008128	51.25	0.000118483	2	1328.55	1.85034	10.5042	1
GKYsPTVQTR	1	1	1	O60437	S4(Phospho)	0	Y(3): 0.9; S(4): 99.1; T(6): 0.0; T(9): 0.0	2.21175e+06	0.007	0.05364	32.5	0.0147052	2	1216.57	0.484315	11.6522	1
sQEDQLSR	1	1	1	Q9HD42	S1(Phospho)	0	S(1): 100.0; S(7): 0.0	4.64952e+07	0.006	0.04042	44.84	0.000352702	2	1042.42	-0.975921	11.6234	0
QVAEQGGDLsPAANR	1	1	1	O94804	S10(Phospho)	0	S(10): 100.0	3.90475e+06	0.001	0.008908	44.73	0.00107515	2	1592.7	-4.93898	15.3394	0
DEAEMsPVVER	1	1	1	A6NDB9	S6(Phospho)	0	S(6): 100.0	904541	0	0.001474	43.04	0.000717576	2	1341.53	-4.51094	20.428	0
ERGDEsPLGAEGAK	1	1	1	A6NDB9	S6(Phospho)	0	S(6): 100.0	2.10015e+06	0.002	0.01175	17.96	0.414286	2	1495.65	2.02128	12.2555	1
ERPQIGGtIK	1	1	1	P13498	T8(Phospho)	0	T(8): 100.0	6.65126e+06	0.005	0.03866	39.58	0.00211496	2	1178.59	0.285949	13.8191	0
TIQsLK	1	1	1	Q01804	S4(Phospho)	0	T(1): 0.0; S(4): 100.0	5.09892e+06	0.009	0.07684	36.62	0.00298346	2	769.387	1.23463	14.5436	0
LQGsATAAEASLLR	1	1	1	Q9H400	S4(Phospho)	0	S(4): 100.0; T(6): 0.0; S(11): 0.0	3.36305e+06	0	0.0007275	36.51	0.00663371	2	1467.72	0.341001	26.4065	0
IAASSsFR	2	1	1	Q99961	S6(Phospho)	0	S(4): 0.0; S(5): 0.9; S(6): 99.1	7.24517e+06	0.002	0.01793	36.11	0.0028654	2	918.408	-0.0486513	15.0359	0
APtISER	1	1	1	O95747	T3(Phospho)	0	T(3): 100.0; S(5): 0.0	4.77577e+06	0.005	0.03758	33.82	0.00246898	2	853.382	0.0188198	12.8353	0
sPGAPGGAR	1	1	1	Q86Y01	S1(Phospho)	0	S(1): 100.0	1.51366e+06	0.001	0.008251	33.82	0.00493795	2	849.362	0.198501	9.9566	0
IPsTVLSR	1	1	1	Q9UBY5	S3(Phospho)	0	S(3): 98.7; T(4): 1.3; S(7): 0.0	2.32856e+06	0.002	0.01851	32.24	0.0084779	2	952.486	-0.690785	21.7416	0
LGAPQQPGPGPPPsR	1	1	1	Q96CX2	S14(Phospho)	0	S(14): 100.0	3.78436e+06	0	0.0004487	30.56	0.0257993	2	1535.74	0.0258083	16.9287	0
LITTDSDGtYR	1	1	1	Q9HCM3	T9(Phospho)	0	T(3): 0.0; T(4): 0.0; S(6): 1.0; T(9): 98.1; Y(10): 1.0	1.17238e+06	0.005	0.03533	27.54	0.0357681	2	1321.57	1.28859	17.0762	0
VGLGLPLsPR	1	1	1	Q03431	S8(Phospho)	0	S(8): 100.0	1.216e+06	0.009	0.0751	22.06	0.137528	2	1088.59	0.822692	32.4551	0
TNPEDIYPSNPTDDDVSSGsSSER	2	1	1	P16070	S20(Phospho)	0	T(1): 0.0; Y(7): 0.0; S(9): 0.0; T(12): 0.0; S(17): 0.0; S(18): 0.0; S(20): 49.6; S(21): 49.6; S(22): 0.9	2.09749e+07	0.001	0.07069	17.73	0.505966	3	2649.05	2.04797	47.3378	0
LIEDNEyTAR	1	4	1	P06239	Y7(Phospho)	0	Y(7): 99.3; T(8): 0.7	1.43697e+07	0	4.657e-06	74.87	6.84257e-07	2	1303.56	1.35392	15.2741	0
